# Supplementary material for: Polyphagy and diversification in tussock moths: Support for the oscillation hypothesis from extreme generalists
Source: PubMed Central journal article supplement (PMC5632610; doi:10.1002/ece3.3350), 2017-08-30
Supplement: ECE3-7-7975-s002.pdf [file ECE3-7-7975-s002.pdf]

Table S1. Host plant data at the species levels of Lymantriinae

| Lymantriinae taxa               | Hostplants (Families)                                                 | Hostplants (Orders)                            |
|---------------------------------|-----------------------------------------------------------------------|------------------------------------------------|
| <i>Daplasa blacklinea</i> *     | Missing                                                               | Missing                                        |
| <i>Daplasa irrorata</i> *       | Missing                                                               | Missing                                        |
| <i>Arctornis diaphora</i> *     | Missing                                                               | Missing                                        |
| <i>Arctornis ecnomoda</i> *     | Bombacaceae                                                           | Malvales                                       |
| <i>Arctornis denudata</i> *     | Missing                                                               | Missing                                        |
| <i>Arctornis jonasi</i> *       | Fagaceae, Adoxaceae, Rosaceae, Chloranthaceae                         | Dipsacales, Rosales, Fagales, Chloranthales    |
| <i>Arctornis discirufa</i> *    | Missing                                                               | Missing                                        |
| <i>Arctornis gracilis</i> *     | Missing                                                               | Missing                                        |
| <i>Arctornis phrika</i> *       | Dipterocarpaceae                                                      | Malvales                                       |
| <i>Arctornis rutila</i> *       | Sterculiaceae, Ebenaceae                                              | Ericales, Malvales                             |
| <i>Arctornis l-nigrum</i> *     | Fagaceae, Rosaceae, Betulaceae, Salicaceae, Ulmaceae, Tiliaceae       | Rosales, Fagales, Malpighiales, Malvales       |
| <i>Arctornis nivea</i> *        | Missing                                                               | Missing                                        |
| <i>Arctornis submarginata</i> * | Lauraceae, Theaceae, Lythraceae, Combretaceae, Sterculiaceae, Poaceae | Laurales, Ericales, Myrtales, Malvales, Poales |
| <i>Arctornis subvitrea</i>      | Theaceae                                                              | Ericales                                       |
| <i>Arctornis phaeocraspeda</i>  | Theaceae                                                              | Ericales                                       |

|                                |                                   |                     |
|--------------------------------|-----------------------------------|---------------------|
| <i>Arctornis anserella</i>     | Theaceae, Fagaceae                | Ericales, Fagales   |
| <i>Arctornis chichibense</i>   | Fagaceae                          | Ericales            |
| <i>Arctornis crocophala</i>    | Theaceae                          | Ericales            |
| <i>Arctornis crgnopsis</i>     | Theaceae                          | Ericales            |
| <i>Arctornis cygna</i>         | Theaceae                          | Ericales            |
| <i>Arctornis diaphana</i>      | Dipterocarpaceae                  | Malvales            |
| <i>Arctornis alba</i>          | Theaceae, Fagaceae, Betulaceae    | Ericales, Fagales,  |
| <i>Arctornis discipuncta</i>   | Combretaceae                      | Myrtales            |
| <i>Arctornis singaporensis</i> | Dipterocarpaceae, Melastomataceae | Malvales            |
| <i>Arctornis egerina</i>       | Euphorbiaceae                     | Malpighiales        |
| <i>Arctornis galene</i>        | Lauraceae                         | Lurales             |
| <i>Arctornis flavescens</i>    | Dipterocarpaceae                  | Malvales            |
| <i>Arctornis riguata</i>       | Anacardiaceae                     | Sapindales          |
| <i>Arctornis perfecta</i>      | Lauraceae, Sapindaceae            | Lurales, Sapindales |
| <i>Arctornis flora</i>         | Bombacaceae                       | Malvales            |
| <i>Arctornis egens?</i>        | Elaeocarpaceae                    | Oxalidales          |
| <i>Arctornis melanocraspis</i> | Rhizophoraceae                    | Malpighiales        |

---

|                                 |                                                           |                                             |
|---------------------------------|-----------------------------------------------------------|---------------------------------------------|
| <i>Arctornis marginalis</i>     | Anacardiaceae, Combretaceae                               | Sapindales, Myrtales                        |
| <i>Arctornis marginata</i>      | Ebenaceae                                                 | Ericales                                    |
| <i>Arctornis</i> spp            | Fabaceae, Brassicaceae                                    | Fabales, Brassicales                        |
| <i>Ruanda aetheria</i> *        | Missing                                                   | Missing                                     |
| <i>Ruanda nuda</i>              | Fabaceae                                                  | Fabales                                     |
| <i>Eloria onaba</i> *           | Erythroxylaceae                                           | Malpighiales                                |
| <i>Eloria torrida</i> *         | Erythroxylaceae, Lauraceae, Myrtaceae, Rhizophoraceae     | Malpighiales, Laurales, Myrtales            |
| <i>Eloria sp</i>                | Fabaceae                                                  | Fabales                                     |
| <i>Eloria captiosa</i>          | Erythroxylaceae                                           | Malpighiales                                |
| <i>Eloria subapicalis</i>       | Erythroxylaceae                                           | Malpighiales                                |
| <i>Eloria moeonia</i>           | Erythroxylaceae, Fabaceae                                 | Malpighiales, Fabales                       |
| <i>Eloria noyesi</i>            | Erythroxylaceae                                           | Malpighiales                                |
| <i>Eloria spectra</i>           | Erythroxylaceae, Fabaceae, Malvaceae                      | Malpighiales, Fabales, Malvales             |
| <i>Euproctoides acrisia</i> *   | Missing                                                   | Missing                                     |
| <i>Locharna strigipennis</i> *  | Fagaceae, Lauraceae, Anacardiaceae, Clusiaceae            | Fagales, Laurales, Sapindales, Malpighiales |
| <i>Locharna limbata</i>         | Leeaceae                                                  | Vitales                                     |
| <i>Kuromondokuga nipponis</i> * | Fagaceae, Betulaceae, Grossulariaceae, Fabaceae, Rosaceae | Fagales, Saxifragales, Fabales, Rosales     |

|                                   |                                                                    |                                                                |
|-----------------------------------|--------------------------------------------------------------------|----------------------------------------------------------------|
| <i>Kuromondokuga albofascia</i> * | Fagaceae, Betulaceae                                               | Fagales                                                        |
| <i>Kuromondokuga disparilis</i>   | Betulaceae                                                         | Fagales                                                        |
| <i>Kuromondokuga separata</i> *   | Missing                                                            | Missing                                                        |
| <i>Pida patrana</i> *             | Missing                                                            | Missing                                                        |
| <i>Pida calligramma</i> *         | Missing                                                            | Missing                                                        |
| <i>Pida pilodes</i> *             | Missing                                                            | Missing                                                        |
| <i>Pida apicalis</i> *            | Missing                                                            | Missing                                                        |
| <i>Pida</i> spp                   | Fagaceae                                                           | Fagales                                                        |
| <i>Pida minensis</i> *            | Missing                                                            | Missing                                                        |
| <i>Leucoma costalis</i> *         | Missing                                                            | Missing                                                        |
| <i>Leucoma salicis</i> *          | Salicaceae, Poaceae, Betulaceae, Aceraceae, Cupressaceae, Rosaceae | Malpighiales, Poales, Fagales, Sapindales,<br>Pinales, Rosales |
| <i>Leucoma ochripes</i>           | Euphorbiaceae, Lauraceae, Ulmaceae                                 | Malpighiales, Laurales, Rosales                                |
| <i>Leucoma candida</i>            | Salicaceae                                                         | Malpighiales                                                   |
| <i>Leucoma sartus</i>             | Salicaceae                                                         | Malpighiales                                                   |
| <i>Leucoma wiltshirei</i>         | Fagaceae                                                           | Fagales                                                        |
| <i>Leucoma cygna</i>              | Lauraceae, Theaceae, Bombacaceae, Magnoliaceae, Sapindaceae        | Laurales, Ericales, Malvales, Magnoliales,                     |

---

|                              |                                                                                            |                                           |
|------------------------------|--------------------------------------------------------------------------------------------|-------------------------------------------|
|                              |                                                                                            | Sapindales                                |
| <i>Leucoma ochropoda</i>     | Ulmaceae                                                                                   | Rosales                                   |
| <i>Leucoma parva</i>         | Asteraceae                                                                                 | Asterales                                 |
| <i>Leucoma sericea</i> *     | Juglandaceae,Lauraceae                                                                     | Fagales, Laurales                         |
| <i>Perina nuda</i> *         | Moraceae, Acanthaceae, Anacardiaceae                                                       | Rosales, Lamiales, Sapindales             |
| <i>Perina munda</i>          | Moraceae                                                                                   | Rosales                                   |
| <i>Leucoma chrysosecla</i> * | Missing                                                                                    | Missing                                   |
| <i>Ivela auripes</i> *       | Cornaceae, Hamamelidaceae                                                                  | Cornales, Saxifragales                    |
| <i>Ivela ochropoda</i>       | Ulmaceae                                                                                   | Rosales                                   |
| <i>Ivela eshanensis</i>      | Lauraceae                                                                                  | Laurales                                  |
| <i>Olapa ?tatavensis</i> *   | Verbenaceae, Bombacaceae,Sterculiaceae                                                     | Lamiales, Malvales                        |
| <i>Olapa_fulviceps</i>       | Malvaceae, Fabaceae                                                                        | Malvales, Fabales                         |
| <i>Olapa nigribasis</i>      | Sterculiaceae, Malvaceae                                                                   | Malvales                                  |
| <i>Olapa crocicollis</i>     | Myrtaceae                                                                                  | Myrtales                                  |
| <i>Olapa nuda</i>            | Fabaceae                                                                                   | Fabales                                   |
| <i>Caviria regina</i> *      | Arecaceae, Fabaceae, Hypericaceae, Melastomataceae, Myrtaceae;<br>Salicaceae, Vochysiaceae | Arecales, Fabales, Malpighiales, Myrtales |

---

|                               |                                                                                                               |                                                            |
|-------------------------------|---------------------------------------------------------------------------------------------------------------|------------------------------------------------------------|
| <i>Caviria</i> spp            | Malpighiaceae, Caryocaraceae, Connaraceae,<br>Ebenaceae, Erythroxylaceae, Asteraceae, Myrsinaceae, Proteaceae | Malpighiales, Oxalidales, Ericales, Arecales,<br>Proteales |
| <i>Thagona errans</i> *       | Myrtaceae                                                                                                     | Myrtales                                                   |
| <i>Thagona tibialis</i> *     | Euphorbiaceae, Combretaceae, Fabaceae, Melastomataceae,<br>Sapindaceae, Vochysiaceae                          | Malpighiales, Myrtales, Fabales, Sapindales                |
| <i>Thagona roseidorsum</i>    | Rosaceae                                                                                                      | Rosales                                                    |
| <i>Thagona parthenica</i>     | Bignoniaceae, Anacardiaceae                                                                                   | Lamiales, Sapindales                                       |
| <i>Imaus munda</i> *          | Missing                                                                                                       | Missing                                                    |
| <i>Cispia lunata</i> *        | Fagaceae                                                                                                      | Fagales                                                    |
| <i>Cispia alba</i>            | Meliaceae                                                                                                     | Sapindales                                                 |
| <i>Cispia charma</i>          | Meliaceae                                                                                                     | Sapindales                                                 |
| <i>Cispia puncticilia</i>     | Sapindaceae                                                                                                   | Sapindales                                                 |
| <i>Dura ippoline</i> *        | Missing                                                                                                       | Missing                                                    |
| <i>Crorema ?jordani</i> *     | Missing                                                                                                       | Missing                                                    |
| <i>Crorema fuscinotata</i>    | Poaceae                                                                                                       | Poales                                                     |
| <i>Crorema mentiens</i>       | Combretaceae                                                                                                  | Myrtales                                                   |
| <i>Sarsina purpurascens</i> * | Myrtaceae                                                                                                     | Myrtales                                                   |

|                                  |                                                                                                                                                                                                                                                                                                                                    |                                                                                                                                                                                                                                          |
|----------------------------------|------------------------------------------------------------------------------------------------------------------------------------------------------------------------------------------------------------------------------------------------------------------------------------------------------------------------------------|------------------------------------------------------------------------------------------------------------------------------------------------------------------------------------------------------------------------------------------|
| <i>Sarsina festiva</i>           | Myrtaceae                                                                                                                                                                                                                                                                                                                          | Myrtales                                                                                                                                                                                                                                 |
| <i>Sarsina violascens</i>        | Myrtaceae, Asteraceae, Oleaceae                                                                                                                                                                                                                                                                                                    | Myrtales, Asterales, Lamiales                                                                                                                                                                                                            |
| <i>Lymantria fergusonii</i> *    | Missing                                                                                                                                                                                                                                                                                                                            | Missing                                                                                                                                                                                                                                  |
| <i>Lymantria furvinis</i> *      | Missing                                                                                                                                                                                                                                                                                                                            | Missing                                                                                                                                                                                                                                  |
| <i>Lymantria nigriplagiata</i> * | Missing                                                                                                                                                                                                                                                                                                                            | Missing                                                                                                                                                                                                                                  |
| <i>Lymantria grisea</i> *        | Missing                                                                                                                                                                                                                                                                                                                            | Missing                                                                                                                                                                                                                                  |
| <i>Lymantria tortivalvula</i> *  | Missing                                                                                                                                                                                                                                                                                                                            | Missing                                                                                                                                                                                                                                  |
| <i>Lymantria mathura</i> *       | Rubiaceae, Fagaceae, Lythraceae, Hamamelidaceae, Anacardiaceae,<br>Lecythidaceae, Dipterocarpaceae, Myrtaceae, Combretaceae, Ulmaceae,<br>Rosaceae, Euphorbiaceae                                                                                                                                                                  | Gentianales, Fagales, Myrtales, Saxifragales,<br>Sapindales, Ericales, Malvales, Rosales,<br>Malpighiales                                                                                                                                |
| <i>Lymantria beatrix</i> *       | Lythraceae, Anacardiaceae, Euphorbiaceae, Punicaceae, Bombacaceae                                                                                                                                                                                                                                                                  | Myrtales, Sapindales, Malpighiales, Malvales                                                                                                                                                                                             |
| <i>Lymantria hauensteini</i> *   | Missing                                                                                                                                                                                                                                                                                                                            | Missing                                                                                                                                                                                                                                  |
| <i>Lymantria dispar</i> *        | Araucariaceae, Cupressaceae, Pinaceae, Taxaceae, Taxodiaceae,<br>Aceraceae, Betulaceae, Rosaceae, Araliaceae, Berberidaceae,<br>Corylaceae, Juglandaceae, Fagaceae, Bignoniaceae, Ulmaceae,<br>Asteraceae, Rutaceae, Clethraceae, Myricaceae, Cornaceae,<br>Caprifoliaceae, Ebenaceae, Oleaceae, Ericaceae, Ginkgoaceae, Fabaceae, | Pinales, Sapindales, Fagales, Rosales, Apiales,<br>Ranunculales, Lamiales, Asterales, Ericales,<br>Cornales, Dipsacales, Ginkgoales, Fabales,<br>Saxifragales, Aquifoliales, Asparagales,<br>Laurales, Magnoliales, Cornales, Proteales, |

|                               |                                                                                                                                                                                                                                         |                                                                                                               |
|-------------------------------|-----------------------------------------------------------------------------------------------------------------------------------------------------------------------------------------------------------------------------------------|---------------------------------------------------------------------------------------------------------------|
|                               | Hamamelidaceae, Aquifoliaceae, Iridaceae, Lauraceae, Moraceae,<br>Magnoliaceae, Cornaceae, Anacardiaceae, Platanaceae, Salicaceae,<br>Grossulariaceae, Polygonaceae, Tamaricaceae, Araceae, Tiliaceae,<br>Vitaceae, Poaceae, Rhamnaceae | Malpighiales, Saxifragales, Caryophyllales,<br>Alismatales, Malvales, Vitales, Poales                         |
| <i>Lymantria schaeferi</i> *  | Missing                                                                                                                                                                                                                                 | Missing                                                                                                       |
| <i>Lymantria concolor</i> *   | Fagaceae, Rosaceae                                                                                                                                                                                                                      | Fagales, Rosales                                                                                              |
| <i>Lymantria dissoluta</i> *  | Pinaceae, Cupressaceae, Fagaceae                                                                                                                                                                                                        | Pinales, Fagales                                                                                              |
| <i>Lymantria monacha</i> *    | Combretaceae, Dipterocarpaceae, Salicaceae, Fagaceae, Pinaceae,<br>Oleaceae, Betulaceae, Rosaceae, Ulmaceae, Aceraceae, Tiliaceae                                                                                                       | Myrtales, Malvales, Malpighiales, Fagales,<br>Pinales, Lamiales, Rosales, Sapindales                          |
| <i>Lymantria similis</i> *    | Missing                                                                                                                                                                                                                                 | Missing                                                                                                       |
| <i>Lymantria lepcha</i>       | Dipterocarpaceae, Sonneratiaceae, Lythraceae, Combretaceae                                                                                                                                                                              | Malvales, Myrtales                                                                                            |
| <i>Lymantria brunneiplaga</i> | Combretaceae, Asteraceae, Convolvulaceae, Cyperaceae,<br>Clusiaceae, Piperaceae, Ulmaceae, Fabaceae, Meliaceae, Euphorbiaceae,<br>Sapotaceae, Turneraceae, Mimosaceae                                                                   | Myrtales, Asterales, Solanales, Poales,<br>Malpighiales, Piperales, Rosales, Fabales,<br>Sapindales, Ericales |
| <i>Lymantria ganara</i>       | Myrtaceae, Fabaceae, Casuarinaceae, Euphorbiaceae, Rubiaceae,<br>Meliaceae                                                                                                                                                              | Myrtales, Fabales, Fagales, Malpighiales,<br>Gentianales, Sapindales                                          |
| <i>Lymantria incerta</i>      | Oleaceae, Sapindaceae, Fabaceae, Moraceae, Combretaceae,                                                                                                                                                                                | Lamiales, Sapindales, Fabales, Rosales,                                                                       |



|                             |                                                                                                                                                  |                                                                                                          |
|-----------------------------|--------------------------------------------------------------------------------------------------------------------------------------------------|----------------------------------------------------------------------------------------------------------|
|                             | Rhamnaceae                                                                                                                                       | Myrtales                                                                                                 |
| <i>Lymantria singapura</i>  | Pinaceae                                                                                                                                         | Pinales                                                                                                  |
| <i>Lymantria fumida</i>     | Cupressaceae, Pinaceae                                                                                                                           | Pinales                                                                                                  |
| <i>Lymantria umbrifera</i>  | Hamamelidaceae                                                                                                                                   | Saxifragales                                                                                             |
| <i>Lymantria minor</i>      | Anacardiaceae, Euphorbiaceae, Fagaceae, Hamamelidaceae, Rosaceae,<br>Ulmaceae, Combretaceae, Dipterocarpaceae, Rubiaceae, Myrtaceae,<br>Fabaceae | Sapindales, Malpighiales, Fagales, Saxifragales,<br>Rosales, Myrtales, Malvales, Genitanales,<br>Fabales |
| <i>Lymantria juglandis</i>  | Juglandaceae                                                                                                                                     | Fagales                                                                                                  |
| <i>Lymantria minomonis</i>  | Cupressaceae, Pinaceae, Fagaceae                                                                                                                 | Pinales, Fagales                                                                                         |
| <i>Lymantria serva</i>      | Moraceae, Combretaceae, Dipterocarpaceae, Lythraceae, Myrtaceae,<br>Verbenaceae                                                                  | Rosales, Myrtales, Malvales, Lamiales                                                                    |
| <i>Lymantria viola</i>      | Oleaceae, Fagaceae, Rosaceae, Combretaceae, Burseraceae, Rubiaceae                                                                               | Lamiales, Fagales, Rosales, Myrtales,<br>Sapindales, Gentianales                                         |
| <i>Lymantria orestera</i>   | Alangiaceae                                                                                                                                      | Cornales                                                                                                 |
| <i>Lymantria nebulosa</i>   | Aceraceae, Hamamelidaceae                                                                                                                        | Sapindales, Saxifragales                                                                                 |
| <i>Lymantria servula</i>    | Pinaceae                                                                                                                                         | Pinales                                                                                                  |
| <i>Lymantria marginalis</i> | Myrtaceae, Anacardiaceae, Dipterocarpaceae                                                                                                       | Myrtales, Sapindales, Malvales                                                                           |

---

|                             |                                                                                                                                                                                                                                               |                                                                                                                                          |
|-----------------------------|-----------------------------------------------------------------------------------------------------------------------------------------------------------------------------------------------------------------------------------------------|------------------------------------------------------------------------------------------------------------------------------------------|
| <i>Lymantria marginata</i>  | Anacardiaceae, Myrtaceae, Dipterocarpaceae, Bombacaceae                                                                                                                                                                                       | Sapindales, Myrtales, Malvales                                                                                                           |
| <i>Lymantria bantaizana</i> | Juglandaceae                                                                                                                                                                                                                                  | Fagales                                                                                                                                  |
| <i>Lymantria lucescens</i>  | Fagaceae                                                                                                                                                                                                                                      | Fagales                                                                                                                                  |
| <i>Lymantria umbrosa</i>    | Fabaceae                                                                                                                                                                                                                                      | Fabales                                                                                                                                  |
| <i>Lymantria pelospila</i>  | Myrtaceae                                                                                                                                                                                                                                     | Myrtales                                                                                                                                 |
| <i>Lymantria ascetria</i>   | Fabaceae, Rosaceae                                                                                                                                                                                                                            | Fabales, Rosales                                                                                                                         |
| <i>Lymantria ampla</i>      | Arecaceae, Rubiaceae, Anacardiaceae, Begoniaceae, Fabaceae,<br>Apocynaceae, Casuarinaceae, Myrtaceae, Moraceae, Malvaceae,<br>Lythraceae, Rosaceae, Geraniaceae, Combretaceae, Euphorbiaceae,<br>Dipterocarpaceae, Verbenaceae, Sterculiaceae | Arecales, Gentianales, Sapindales, Cucurbitales,<br>Fabales, Fagales, Myrtales, Rosales, Malvales,<br>Geraniales, Malpighiales, Lamiales |
| <i>Lymantria destituta</i>  | Rosaceae, Casuarinaceae                                                                                                                                                                                                                       | Rosales, Fagales                                                                                                                         |
| <i>Lymantria atemeles</i>   | Anacardiaceae, Arecaceae                                                                                                                                                                                                                      | Sapindales, Arecales                                                                                                                     |
| <i>Lymantria bivittata</i>  | Lythraceae, Lecythidaceae, Fagaceae, Dipterocarpaceae, Combretaceae                                                                                                                                                                           | Myrtales, Ericales, Fagales, Malvales                                                                                                    |
| <i>Lymantria grandis</i>    | Moraceae, Lecythidaceae, Dipterocarpaceae                                                                                                                                                                                                     | Rosales, Ericales, Malvales                                                                                                              |
| <i>Lymantria lunata</i>     | Anacardiaceae, Rutaceae, Ebenaceae, Myrtaceae, Moraceae,<br>Euphorbiaceae, Fabaceae, Combretaceae                                                                                                                                             | Sapindales, Ericales, Myrtales, Rosales,<br>Malpighiales, Fabales                                                                        |
| <i>Lymantria loacana</i>    | Pinaceae                                                                                                                                                                                                                                      | Pinales                                                                                                                                  |

---

|                                |                                                                         |                                          |
|--------------------------------|-------------------------------------------------------------------------|------------------------------------------|
| <i>Lymantria lapidicola</i>    | Pinaceae, Rosaceae                                                      | Pinales, Rosales                         |
| <i>Lymantria modesta</i>       | Capparaceae, Anacardiaceae                                              | Brassicales, Sapindales                  |
| <i>Lymantria nigra</i>         | Loranthaceae, Anacardiaceae                                             | Santalales, Sapindales                   |
| <i>Lymantria ninayi</i>        | Pinaceae                                                                | Pinales                                  |
| <i>Lymantria novaguinensis</i> | Pinaceae                                                                | Pinales                                  |
| <i>Lymantria rosina</i>        | Myrtaceae                                                               | Myrtales                                 |
| <i>Lymantria nebulosa</i>      | Hamamelidaceae                                                          | Saxifragales                             |
| <i>Lymantria obfuscata</i>     | Betulaceae, Rosaceae, Juglandaceae, Salicaceae, Fagaceae, Sterculiaceae | Fagales, Rosales, Malpighiales, Malvales |
| <i>Lymantria singapura</i>     | Pinaceae                                                                | Pinales                                  |
| <i>Lymantria sobrina</i>       | Pinaceae                                                                | Pinales                                  |
| <i>Lymantria sphalera</i>      | Combretaceae                                                            | Myrtales                                 |
| <i>Lymantria subrosea</i>      | Dipterocarpaceae                                                        | Malvales                                 |
| <i>Lymantria todara</i>        | Lythraceae, Dipterocarpaceae, Combretaceae                              | Myrtales, Malvales                       |
| <i>Lymantria viola</i>         | Combretaceae, Rubiaceae                                                 | Malvales, Gentianales                    |
| <i>Lymantria detera</i>        | Casuarinaceae                                                           | Fagales                                  |
| <i>Lymantria obliquilinea</i>  | Cannaceae                                                               | Zingiberales                             |
| <i>Lymantria semicincta</i>    | Dipterocarpaceae                                                        | Malvales                                 |

---

|                               |                                                                                                                                                                                                                                                                                                    |                                                                                                           |
|-------------------------------|----------------------------------------------------------------------------------------------------------------------------------------------------------------------------------------------------------------------------------------------------------------------------------------------------|-----------------------------------------------------------------------------------------------------------|
| <i>Lymantria xyli</i>         | Casuarinaceae, Fabaceae, Simaroubaceae, Fagaceae, Juglandaceae, Salicaceae, Myrtaceae, Malvaceae, Meliaceae, Altingiaceae, Euphorbiaceae, Paulowniaceae, Sapindaceae, Rosaceae, Moraceae, Lythraceae, Ebenaceae, Theaceae, Hamamelidaceae, Mimosaceae, Sterculiaceae, Scrophulariaceae, Punicaceae | Fagales, Fabales, Sapindales, Malpighiales, Myrtales, Malvales, Saxifragales, Lamiales, Rosales, Ericales |
| <i>Aroa discalis</i> *        | Poaceae                                                                                                                                                                                                                                                                                            | Poales                                                                                                    |
| <i>Aroa danva</i>             | Asteraceae                                                                                                                                                                                                                                                                                         | Asterales                                                                                                 |
| <i>Aroa difficilis</i>        | Combretaceae, Ebenaceae                                                                                                                                                                                                                                                                            | Myrtales, Ericales                                                                                        |
| <i>Aroa interrogationis</i>   | Poaceae                                                                                                                                                                                                                                                                                            | Poales                                                                                                    |
| <i>Aroa melanoleuca</i>       | Myrtaceae, Pinaceae                                                                                                                                                                                                                                                                                | Myrtales, Pinales                                                                                         |
| <i>Hemerophanes diatoma</i> * | Missing                                                                                                                                                                                                                                                                                            | Missing                                                                                                   |
| <i>Hemerophanes enos</i>      | Combretaceae                                                                                                                                                                                                                                                                                       | Myrtales                                                                                                  |
| <i>Hemerophanes libyra</i>    | Combretaceae                                                                                                                                                                                                                                                                                       | Myrtales                                                                                                  |
| <i>Ilema anaha</i> *          | Missing                                                                                                                                                                                                                                                                                            | Missing                                                                                                   |
| <i>Ilema costalis</i> *       | Missing                                                                                                                                                                                                                                                                                            | Missing                                                                                                   |
| <i>Ilema catocaloides</i> *   | Missing                                                                                                                                                                                                                                                                                            | Missing                                                                                                   |
| <i>Ilema jankowskii</i> *     | Vitaceae, Rosaceae, Grossulariaceae                                                                                                                                                                                                                                                                | Vitales, Rosales, Saxifragales                                                                            |

---

|                               |                                                                                                                                                                                                  |                                                                                                                     |
|-------------------------------|--------------------------------------------------------------------------------------------------------------------------------------------------------------------------------------------------|---------------------------------------------------------------------------------------------------------------------|
| <i>Ilema vaneeckeii</i>       | Rutaceae, Rubiaceae                                                                                                                                                                              | Sapindales, Gentianales                                                                                             |
| <i>Ilema baruna</i>           | Fabaceae, Dipterocarpaceae, Melastomataceae, Rubiaceae                                                                                                                                           | Fabales, Malvales, Myrtales, Gentianales                                                                            |
| <i>Ilema preangerensis</i>    | Orchidaceae                                                                                                                                                                                      | Asparagales                                                                                                         |
| <i>Ilema inclusa</i>          | Malvaceae, Loganiaceae, Melastomataceae, Lauraceae                                                                                                                                               | Malvales, Gentianales, Myrtales, Laurales                                                                           |
| <i>Ilema sp</i>               | Gleicheniaceae                                                                                                                                                                                   | Gleicheniales                                                                                                       |
| <i>Ilema chalana</i>          | Fabaceae                                                                                                                                                                                         | Fabales                                                                                                             |
| <i>Ilema nachiensis</i>       | Lauraceae, Fagaceae, Betulaceae, Cornaceae, Euphorbiaceae,<br>Boraginaceae, Malvaceae, Loganiaceae, Melastomataceae                                                                              | Laurales, Fagales, Cornales, Malpighiales,<br>Boraginales, Malvales, Gentianales, Myrtales                          |
| <i>Ilema eurydice</i>         | Vitaceae, Rosaceae, Hydrangeaceae, Actinidiaceae, Clethraceae                                                                                                                                    | Vitales, Rosales, Cornales, Ericales                                                                                |
| <i>Mylantria xanthospila*</i> | Rubiaceae, Pinaceae, Asteraceae, Poaceae                                                                                                                                                         | Gentianales, Pinales, Asterales, Poales                                                                             |
| <i>Griveaudyria ?cangia*</i>  | Missing                                                                                                                                                                                          | Missing                                                                                                             |
| <i>Griveaudyria ila</i>       | Mimosaceae                                                                                                                                                                                       | Fabales                                                                                                             |
| <i>Calliteara grotei*</i>     | Fabaceae, Berberidaceae, Myrtaceae, Lythraceae, Euphorbiaceae,<br>Rosaceae, Lauraceae, Polygonaceae, Salicaceae, Fagaceae, Salicaceae,<br>Verbenaceae, Dipterocarpaceae, Combretaceae, Malvaceae | Fabales, Ranunculales, Myrtales, Malpighiales,<br>Rosales, Laurales, Caryophyllales, Fagales,<br>Malvales, Lamiales |
| <i>Calliteara melli*</i>      | Pinaceae, Cupressaceae                                                                                                                                                                           | Pinales                                                                                                             |
| <i>Calliteara contexta*</i>   | Missing                                                                                                                                                                                          | Missing                                                                                                             |

|                                 |                                                                                                                                                      |                                                                                                                     |
|---------------------------------|------------------------------------------------------------------------------------------------------------------------------------------------------|---------------------------------------------------------------------------------------------------------------------|
| <i>Calliteara angulata</i> *    | Fagaceae                                                                                                                                             | Fagales                                                                                                             |
| <i>Calliteara complicata</i> *  | Missing                                                                                                                                              | Missing                                                                                                             |
| <i>Calliteara taiwana</i> *     | Fagaceae                                                                                                                                             | Fagales                                                                                                             |
| <i>Calliteara wolongensis</i> * | Missing                                                                                                                                              | Missing                                                                                                             |
| <i>Calliteara argentata</i>     | Taxodiaceae, Cupressaceae                                                                                                                            | Pinales                                                                                                             |
| <i>Calliteara Kikuchii</i>      | Fagaceae                                                                                                                                             | Fagales                                                                                                             |
| <i>Calliteara lunulata</i>      | Fagaceae                                                                                                                                             | Fagales                                                                                                             |
| <i>Calliteara farenoides</i>    | Combretaceae                                                                                                                                         | Myrtales                                                                                                            |
| <i>Calliteara pseudabietis</i>  | Rosaceae, Salicaceae, Fagaceae, Aceraceae, Juglandaceae, Cornaceae,<br>Caprifoliaceae, Ebenaceae, Lauraceae, Polygonaceae,<br>Pinaceae, Cupressaceae | Rosales, Malpighiales, Fagales, Sapindales,<br>Cornales, Dipsacales, Ericales, Laurales,<br>Caryophyllales, Pinales |
| <i>Calliteara baibarana</i>     | Theaceae                                                                                                                                             | Ericales                                                                                                            |
| <i>Calliteara abietis</i>       | Pinaceae, Cupressaceae, Taxodiaceae                                                                                                                  | Pinales                                                                                                             |
| <i>Calliteara pura</i>          | Myrtaceae, Pinaceae, Rosaceae, Amaryllidaceae, Musaceae,<br>Magnoliaceae                                                                             | Myrtales, Pinales, Rosales, Zingiberales,<br>Magnoliales, Asparagales                                               |
| <i>Calliteara axutha</i>        | Pinaceae                                                                                                                                             | Pinales                                                                                                             |

|                                 |                                                                                                                                                                                                                                                                                                                                                                                                                                                    |                                                                                                                                                                                                                      |
|---------------------------------|----------------------------------------------------------------------------------------------------------------------------------------------------------------------------------------------------------------------------------------------------------------------------------------------------------------------------------------------------------------------------------------------------------------------------------------------------|----------------------------------------------------------------------------------------------------------------------------------------------------------------------------------------------------------------------|
| <i>Calliteara horsfieldi</i>    | Paulowniaceae, Salicaceae, Platanaceae, Ulmaceae, Fabaceae,<br>Lauraceae, Euphorbiaceae, Rosaceae, Mimosaceae, Anacardiaceae,<br>Begoniaceae, Bixaceae, Brassicaceae, Theaceae, Arecaceae, Rubiaceae,<br>Myrtaceae, Lythraceae, Verbenaceae, Sapotaceae, Clusiaceae, Tiliaceae,<br>Musaceae, Ericaceae, Sapindaceae, Combretaceae, Sterculiaceae,<br>Hamamelidaceae, Malvaceae, Casuarinaceae, Dipterocarpaceae,<br>Moraceae, Pinaceae, Sapotaceae | Lamiales, Malpighiales, Proteales, Rosales,<br>Fabales, Laurales, Sapindales, Cucurbitales,<br>Malvales, Brassicales, Ericales, Arecales,<br>Gentianales, Myrtales, Zingiberales,<br>Saxifragales, Fagales, Pinales, |
| <i>Calliteara queenslandica</i> | Pinaceae                                                                                                                                                                                                                                                                                                                                                                                                                                           | Pinales,                                                                                                                                                                                                             |
| <i>Calliteara strigata</i>      | Fagaceae                                                                                                                                                                                                                                                                                                                                                                                                                                           | Fagales                                                                                                                                                                                                              |
| <i>Calliteara thwaitesii</i>    | Anacardiaceae, Theaceae, Fabaceae, Lecythidaceae, Dipterocarpaceae                                                                                                                                                                                                                                                                                                                                                                                 | Sapindales, Ericales, Fabales, Malvales                                                                                                                                                                              |
| <i>Calliteara varia</i>         | Lamiaceae                                                                                                                                                                                                                                                                                                                                                                                                                                          | Lamiales                                                                                                                                                                                                             |
| <i>Calliteara fidjiensis</i>    | Myrtaceae, Rhizophoraceae                                                                                                                                                                                                                                                                                                                                                                                                                          | Myrtales, Malpighiales                                                                                                                                                                                               |
| <i>Calliteara salomonis</i>     | Combretaceae                                                                                                                                                                                                                                                                                                                                                                                                                                       | Myrtales                                                                                                                                                                                                             |
| <i>Calliteara cerigoides</i>    | Dipterocarpaceae, Myrtaceae                                                                                                                                                                                                                                                                                                                                                                                                                        | Malvales, Myrtales                                                                                                                                                                                                   |
| <i>Calliteara pudibunda</i>     | Fagaceae, Salicaceae, Betulaceae, Rosaceae, Geraniaceae, Aceraceae,<br>Corylaceae, Ericaceae, Cannabaceae, Juglandaceae, Tiliaceae, Ulmaceae,<br>Santalaceae                                                                                                                                                                                                                                                                                       | Fagales, Malpighiales, Rosales, Geraniales,<br>Sapindales, Ericales, Malvales, Santalales                                                                                                                            |

|                             |                                                                                   |                                                                    |
|-----------------------------|-----------------------------------------------------------------------------------|--------------------------------------------------------------------|
| <i>Calliteara conjuncta</i> | Fagaceae,Salicaceae, Euphorbiaceae, Fabaceae, Altingiaceae, Pinaceae,<br>Theaceae | Fagales, Malpighiales, Fabales, Pinales,<br>Ericales, Saxifragales |
| <i>Calliteara</i> spp       | Rutaceae, Bruniaceae, Poaceae                                                     | Sapindales, Bruniales, Poales                                      |
| <i>Laelia coenosa</i> *     | Poaceae, Juncaceae, Cyperaceae, Ulmaceae, Salicaceae, Asteraceae                  | Poales, Rosales, Malpighiales, Asterales                           |
| <i>Laelia umbrina</i> *     | Poaceae                                                                           | Poales                                                             |
| <i>Laelia suffusa</i>       | Poaceae, Cyperaceae                                                               | Poales                                                             |
| <i>Laelia gigantea</i>      | Poaceae, Cyperaceae                                                               | Poales                                                             |
| <i>Laelia devestita</i>     | Poaceae                                                                           | Poales                                                             |
| <i>Laelia extorta</i>       | Moraceae                                                                          | Rosales                                                            |
| <i>Laelia adalia</i>        | Poaceae                                                                           | Poales                                                             |
| <i>Laelia calamaria</i>     | Arecaceae                                                                         | Arecales                                                           |
| <i>Laelia litura</i>        | Poaceae                                                                           | Poales                                                             |
| <i>Laelia subrosea</i>      | Poaceae                                                                           | Poales                                                             |
| <i>Laelia venosa</i>        | Arecaceae                                                                         | Arecales                                                           |
| <i>Laelia fasciata</i>      | Poaceae                                                                           | Poales                                                             |
| <i>Laelia figlina</i>       | Cyperaceae, Juncaceae                                                             | Poales                                                             |
| <i>Laelia fracta</i>        | Poaceae, Cyperaceae, Pinaceae                                                     | Poales, Pinales                                                    |

---



|                                |                                                                       |                                                  |
|--------------------------------|-----------------------------------------------------------------------|--------------------------------------------------|
| <i>Laelia flandria</i>         | Areaceae                                                              | Arecales                                         |
| <i>Laelia exclamationis</i>    | Poaceae, Cannaceae                                                    | Poales, Zingiberales                             |
| <i>Pantana substrigosa</i> *   | Poaceae                                                               | Poales                                           |
| <i>Pantana sinica</i> *        | Poaceae                                                               | Poales                                           |
| <i>Pantana visum</i> *         | Poaceae                                                               | Poales                                           |
| <i>Pantana nigrolimbata</i>    | Poaceae                                                               | Poales                                           |
| <i>Pantana pluto</i>           | Poaceae                                                               | Poales                                           |
| <i>Pantana adara</i>           | Poaceae                                                               | Poales                                           |
| <i>Pantana leucogramma</i>     | Poaceae                                                               | Poales                                           |
| <i>Pantana ochripalpis</i>     | Poaceae                                                               | Poales                                           |
| <i>Pantana simplex</i>         | Poaceae                                                               | Poales                                           |
| <i>Pantana phyllostachysae</i> | Poaceae                                                               | Poales                                           |
| <i>Neomardara africana</i> *   | Missing                                                               | Missing                                          |
| <i>Dasychira glaucozona</i> *  | Missing                                                               | Missing                                          |
| <i>Olene dudgeoni</i> *        | Rutaceae, Euphorbiaceae                                               | Sapindales, Malpighiales                         |
| <i>Telochurus sp</i>           | Fagaceae, Rosaceae, Fabaceae                                          | Fagales, Fabales, Rosales                        |
| <i>Cifuna locuples</i> *       | Poaceae, Salicaceae, Rosaceae, Fagaceae, Polygonaceae, Saxifragaceae, | Poales, Malpighiales, Rosales, Fagales, Fabales, |

---

|                               |                                                                                                                |                                                        |
|-------------------------------|----------------------------------------------------------------------------------------------------------------|--------------------------------------------------------|
|                               | Vitaceae, Ulmaceae, Fabaceae, Theaceae, Ebenaceae,                                                             | Caryophyllales, Saxifragales, Vitales, Ericales        |
| <i>Dasychira tephra</i> *     | Fagaceae                                                                                                       | Fagales                                                |
| <i>Dasychira dorsipennata</i> | Aceraceae, Hippocastanaceae, Rosaceae, Betulaceae, Juglandaceae,<br>Fagaceae, Corylaceae, Salicaceae, Ulmaceae | Rosales, Fagales, Malpighiales, Sapindales             |
| <i>Dasychira vagans</i>       | Pinaceae, Salicaceae, Aceraceae, Betulaceae, Rosaceae, Fagaceae,<br>Ulmaceae                                   | Rosales, Sapindales, Malpighiales, Fagales,<br>Pinales |
| <i>Dasychira atrivenosa</i>   | Hamamelidaceae                                                                                                 | Saxifragales                                           |
| <i>Dasychira basiflava</i>    | Betulaceae, Juglandaceae, Rosaceae, Fagaceae, Tiliaceae, Ulmaceae,<br>Ericaceae                                | Rosales, Fagales, Malvales, Ericales                   |
| <i>Dasychira meridionalis</i> | Juglandaceae, Fagaceae, Euphorbiaceae, Rosaceae, Ulmaceae                                                      | Rosales, Fagales, Malpighiales                         |
| <i>Dasychira cinnamomea</i>   | Fagaceae, Cyperaceae, Juglandaceae, Rosaceae, Corylaceae, Ulmaceae                                             | Rosales, Fagales, Poales                               |
| <i>Dasychira leucophaea</i>   | Betulaceae, Juglandaceae, Ebenaceae, Hamamelidaceae, Rosaceae,<br>Pinaceae, Fagaceae                           | Rosales, Fagales, Ericales, Saxifragales, Pinales      |
| <i>Dasychira obliquata</i>    | Aceraceae, Betulaceae, Juglandaceae, Fagaceae, Rosaceae, Ulmaceae,<br>Ericaceae                                | Sapindales, Fagales, Rosales, Ericales                 |
| <i>Dasychira dominickaria</i> | Taxodiaceae                                                                                                    | Pinales                                                |
| <i>Dasychira plagiata</i>     | Aceraceae, Betulaceae, Asteraceae, Cupressaceae, Pinaceae, Fabaceae,                                           | Sapindales, Fagales, Rosales, Pinales, Asterales,      |

|                              |                                                                                                                                                                                                                                                                                                  |                                                                                                                                                                                                                 |
|------------------------------|--------------------------------------------------------------------------------------------------------------------------------------------------------------------------------------------------------------------------------------------------------------------------------------------------|-----------------------------------------------------------------------------------------------------------------------------------------------------------------------------------------------------------------|
|                              | Salicaceae, Rosaceae, Fagaceae, Taxodiaceae, Tiliaceae, Ulmaceae                                                                                                                                                                                                                                 | Malpighiales, Malvales                                                                                                                                                                                          |
| <i>Dasychira pinicola</i>    | Pinaceae                                                                                                                                                                                                                                                                                         | Pinales                                                                                                                                                                                                         |
| <i>Dasychira griseifacta</i> | Pinaceae, Asteraceae, Cupressaceae, Taxodiaceae                                                                                                                                                                                                                                                  | Pinales, Asterales                                                                                                                                                                                              |
| <i>Dasychira manto</i>       | Pinaceae                                                                                                                                                                                                                                                                                         | Pinales                                                                                                                                                                                                         |
| <i>Psalis pennatula*</i>     | Poaceae, Brassicaceae, Theaceae, Cyperaceae, Cucurbitaceae,<br>Casuarinaceae, Lauraceae, Dipterocarpaceae, Solanaceae, Verbenaceae,<br>Fabaceae, Pinaceae                                                                                                                                        | Poales, Ericales, Brassicales, Cucurbitales,<br>Fagales, Laurales, Malvales, Solanales,<br>Lamiales, Fabales, Pinales                                                                                           |
| <i>Teia parallela*</i>       | Platanaceae, Euphorbiaceae, Fagaceae                                                                                                                                                                                                                                                             | Proteales, Malpighiales, Fagales                                                                                                                                                                                |
| <i>Teia anartoides</i>       | Mimosaceae, Fabaceae, Tamaricaceae, Asteraceae, Solanaceae,<br>Brassicaceae, Rosaceae, Cupressaceae, Asteraceae, Myrtaceae,<br>Santalaceae, Rubiaceae, Iridaceae, Verbenaceae, Musaceae,<br>Passifloraceae, Pinaceae, Platanaceae, Primulaceae, Salicaceae,<br>Ulmaceae, Geraniaceae, Proteaceae | Fabales, Caryophyllales, Asterales, Solanales,<br>Brassicales, Rosales, Pinales, Myrtales,<br>Santalales, Gentianales, Asparagales, Lamiales,<br>Zingiberales, Malpighiales, Proteales, Ericales,<br>Geraniales |
| <i>Teia prisca</i>           | Elaeagnaceae                                                                                                                                                                                                                                                                                     | Rosales                                                                                                                                                                                                         |
| <i>Teia gonostigma</i>       | Rosaceae, Rutaceae, Platanaceae, Salicaceae, Betulaceae, Ulmaceae,<br>Fagaceae, Corylaceae, Paulowniaceae, Pinaceae                                                                                                                                                                              | Rosales, Malpighiales, Fagales, Proteales,<br>Lamiales, Pinales                                                                                                                                                 |
| <i>Teia athlophora</i>       | Mimosaceae, Proteaceae, Fabaceae                                                                                                                                                                                                                                                                 | Fabales, Proteales                                                                                                                                                                                              |

|                          |                                                                                                                                                                                                                                                                                                                                                                                                                                                                                        |                                                                                                                                                                                                                                        |
|--------------------------|----------------------------------------------------------------------------------------------------------------------------------------------------------------------------------------------------------------------------------------------------------------------------------------------------------------------------------------------------------------------------------------------------------------------------------------------------------------------------------------|----------------------------------------------------------------------------------------------------------------------------------------------------------------------------------------------------------------------------------------|
| <i>Teia trigotephras</i> | Fabaceae, Fagaceae                                                                                                                                                                                                                                                                                                                                                                                                                                                                     | Fabales, Fagales                                                                                                                                                                                                                       |
| <i>Teia ericae</i>       | Ericaceae, Salicaceae, Fagaceae, Rosaceae, Elaeagnaceae, Fabaceae,<br>Myricaceae, Rhamnaceae, Tamaricaceae                                                                                                                                                                                                                                                                                                                                                                             | Ericales, Fagales, Malpighiales, Rosales,<br>Fabales, Caryophyllales                                                                                                                                                                   |
| <i>Teia</i> spp          | Sterculiaceae, Chenopodiaceae, Euphorbiaceae, Anacardiaceae, Poaceae                                                                                                                                                                                                                                                                                                                                                                                                                   | Malpighiales, Malvales, Caryophyllales,<br>Sapindales, Poales                                                                                                                                                                          |
| <i>Olene inclusa*</i>    | Annonaceae, Avertroaceae, Bombacaceae, Dipterocarpaceae,<br>Euphorbiaceae, Leeaceae, Geraniaceae, Fabaceae, Moraceae, Musaceae,<br>Myrtaceae, Rosaceae, Rutaceae, Sterculiaceae, Tiliaceae, Verbenaceae,<br>Oxalidaceae, Casuarinaceae, Lauraceae, Arecaceae, Rubiaceae,<br>Anacardiaceae, Orchidaceae, Solanaceae, Poaceae                                                                                                                                                            | Magnoliales, Oxalidales, Malvales,<br>Malpighiales, Vitales, Geraniales, Fabales,<br>Rosales, Zingiberales, Myrtales, Sapindales,<br>Lamiales, Fagales, Laurales, Arecales,<br>Gentianales, Asparagales, Solanales, Poales             |
| <i>Olene mendosa</i>     | Anacardiaceae, Bombacaceae, Combretaceae, Brassicaceae, Lythraceae,<br>Dipterocarpaceae, Euphorbiaceae, Geraniaceae, Fabaceae, Malvaceae,<br>Rhamnaceae, Rosaceae, Santalaceae, Sapindaceae, Sapotaceae,<br>Solanaceae, Theaceae, Verbenaceae, Poaceae, Rubiaceae, Sterculiaceae,<br>Salicaceae, Lecythidaceae, Pinaceae, Lauraceae, Musaceae, Moraceae,<br>Moringaceae, Myrtaceae, Tiliaceae, Lamiaceae, Proteaceae,<br>Loranthaceae, Myrsinaceae, Iridaceae, Ebenaceae, Marantaceae, | Sapindales, Malvales, Myrtales, Brassicales,<br>Malpighiales, Geraniales, Fabales, Rosales,<br>Santalales, Ericales, Solanales, Lamiales,<br>Poales, Gentianales, Pinales, Laurales,<br>Zingiberales, Proteales, Asparagales, Arecales |

Flacourtiaceae, Arecaceae, Cannaceae, Apocynaceae, Urticaceae,  
Alliaceae, Asparagaceae

*Orgyia antiqua*\*

Pinaceae, Aceraceae, Betulaceae, Rosaceae, Apiaceae, Asteraceae,  
Fabaceae, Saxifragaceae, Corylaceae, Cucurbitaceae, Fagaceae,  
Rhamnaceae, Oleaceae, Geraniaceae, Cannabaceae, Plantaginaceae,  
Salicaceae, Grossulariaceae, Polygonaceae, Cupressaceae, Tiliaceae,  
Ulmaceae, Ericaceae, Scrophulariaceae, Adoxaceae, Berberidaceae

Pinales, Sapindales, Fagales, Rosales, Apiales,  
Asterales, Fabales, Saxifragales, Cucurbitales,  
Lamiales, Geraniales, Malpighiales, Malvales,  
Caryophyllales, Ericales, Dipsacales,  
Ranunculales

*Orgyia povera*\*

Anacardiaceae, Fabaceae, Malpighiaceae

Sapindales, Fabales, Malpighiales

*Orgyia osseata*\*

Anacardiaceae, Avertroaceae, Bombacaceae, Dipterocarpaceae,  
Fabaceae, Myrtaceae, Rubiaceae, Sapindaceae, Sonneratiaceae,  
Sterculiaceae, Annonaceae, Euphorbiaceae, Theaceae, Lauraceae,  
Vitaceae, Melastomataceae, Sapotaceae, Lecythidaceae, Euphorbiaceae,  
Apocynaceae, Sterculiaceae, Poaceae, Rhamnaceae, Rosaceae

Sapindales, Oxalidales, Malvales, Fabales,  
Myrtales, Gentianales, Magnoliales,  
Malpighiales, Ericales, Laurales, Vitales,  
Poales, Rosales

*Orgyia araea*

Fabaceae, Ebenaceae, Cannaceae, Rubiaceae, Moraceae

Fabales, Ericales, Zingiberales, Gentianales,  
Rosales

|                           |                                                                                                                                |                                                                                                        |
|---------------------------|--------------------------------------------------------------------------------------------------------------------------------|--------------------------------------------------------------------------------------------------------|
| <i>Orgyia basinigra</i>   | Dipterocarpaceae, Fabaceae, Sterculiaceae, Zingiberaceae                                                                       | Malvales, Fabales, Zingiberales                                                                        |
| <i>Orgyia ariadne</i>     | Fabaceae                                                                                                                       | Fabales                                                                                                |
| <i>Orgyia thyllina</i>    | Rosaceae, Moraceae, Fagaceae, Salicaceae, Fabaceae, Cannabaceae,<br>Malvaceae, Platanaceae, Cornaceae, Polygonaceae, Ebenaceae | Rosales, Fagales, Malpighiales, Fabales,<br>Malvales, Proteales, Cornales, Caryophyllales,<br>Ericales |
| <i>Orgyia truncata</i>    | Moraceae                                                                                                                       | Rosales                                                                                                |
| <i>Orgyia aurolimbata</i> | Fabaceae                                                                                                                       | Fabales                                                                                                |
| <i>Orgyia rupestris</i>   | Fabaceae, Plumbaginaceae                                                                                                       | Fabales, Caryophyllales                                                                                |
| <i>Orgyia corsica</i>     | Fagaceae, Fabaceae                                                                                                             | Fagales, Fabales                                                                                       |
| <i>Orgyia affinis</i>     | Rubiaceae, Clusiaceae, Smilacaceae                                                                                             | Gentianales, Malpighiales, Liliales                                                                    |
| <i>Orgyia antiquoides</i> | Ericaceae, Empetraceae, Rosaceae, Myricaceae, Salicaceae                                                                       | Ericales, Rosales, Fagales, Malpighiales                                                               |
| <i>Orgyia australis</i>   | Mimosaceae, Fabaceae, Myrsinaceae, Araucariaceae, Proteaceae,<br>Theaceae, Geraniaceae, Pinaceae, Sterculiaceae                | Fabales, Ericales, Pinales, Proteales, Geraniales,<br>Malvales                                         |
| <i>Orgyia basinigra</i>   | Fabaceae, Lauraceae, Sterculiaceae                                                                                             | Fabales, Laurales, Malvales                                                                            |
| <i>Orgyia cana</i>        | Rhamnaceae, Rosaceae, Fagaceae, Caprifoliaceae                                                                                 | Rosales, Fagales, Dipsacales                                                                           |
| <i>Orgyia tuberculata</i> | Podocarpaceae                                                                                                                  | Pinales                                                                                                |
| <i>Orgyia basalis</i>     | Fabaceae, Euphorbiaceae, Alliaceae, Rubiaceae, Iridaceae,                                                                      | Fabales, Malpighiales, Asparagales,                                                                    |

|                             |                                                                                                                                                |                                                                                                 |
|-----------------------------|------------------------------------------------------------------------------------------------------------------------------------------------|-------------------------------------------------------------------------------------------------|
|                             | Flacourtiaceae, Myrtaceae, Geraniaceae, Malvaceae, Myrsinaceae,<br>Pinaceae, Rosaceae, Verbenaceae, Asteraceae, Combretaceae,<br>Sterculiaceae | Gentianales, Myrtales, Geraniales, Malvales,<br>Ericales, Pinales, Rosales, Lamiales, Asterales |
| <i>Orgyia defnita</i>       | Aceraceae, Betulaceae, Hamamelidaceae, Salicaceae, Tiliaceae,<br>Ulmaceae                                                                      | Sapindales, Fagales, Saxifragales, Malpighiales,<br>Malvales, Rosales                           |
| <i>Orgyia detrita</i>       | Anacardiaceae, Lauraceae, Fagaceae, Taxodiaceae                                                                                                | Sapindales, Laurales, Fagales, Pinales                                                          |
| <i>Orgyia falcata</i>       | Fagaceae                                                                                                                                       | Fagales                                                                                         |
| <i>Orgyia recens</i>        | Betulaceae, Ericaceae, Rosaceae, Salicaceae, Fagaceae                                                                                          | Fagales, Ericales, Rosales, Malpighiales                                                        |
| <i>Orgyia pseudotsugata</i> | Pinaceae, Cupressaceae, Celastraceae, Grossulariaceae, Rosaceae,<br>Salicaceae                                                                 | Pinales, Celastrales, Saxifragales, Rosales,<br>Malpighiales                                    |
| <i>Orgyia viridescens</i>   | Moraceae                                                                                                                                       | Rosales                                                                                         |
| <i>Orgyia triangularis</i>  | Theaceae, Rosaceae, Lythraceae, Fagaceae, Coriariaceae, Santalaceae,<br>Cistaceae                                                              | Rosales, Fagales, Ericales, Myrtales,<br>Cucurbitales, Santalales, Malvales                     |
| <i>Orgyia hopkinsi</i>      | Rubiaceae, Cupressaceae, Myrtaceae, Lythraceae, Pinaceae                                                                                       | Gentianales, Pinales, Myrtales                                                                  |

|                           |                                                                                                                                                                                                                                                                                                                                                                                                                                                                                                                                                                                                                                                                                                |                                                                                                                                                                                                                                                                                                                   |
|---------------------------|------------------------------------------------------------------------------------------------------------------------------------------------------------------------------------------------------------------------------------------------------------------------------------------------------------------------------------------------------------------------------------------------------------------------------------------------------------------------------------------------------------------------------------------------------------------------------------------------------------------------------------------------------------------------------------------------|-------------------------------------------------------------------------------------------------------------------------------------------------------------------------------------------------------------------------------------------------------------------------------------------------------------------|
| <i>Orgyia leucostigma</i> | Pinaceae, Aceraceae, Hippocastanaceae, Simaroubaceae, Betulaceae,<br>Rosaceae, Berberidaceae, Juglandaceae, Corylaceae, Bignoniaceae,<br>Fagaceae, Ulmaceae, Rubiaceae, Fabaceae, Asteraceae, Chenopodiaceae,<br>Oleaceae, Ranunculaceae, Convallariaceae, Cornaceae, Anacardiaceae,<br>Cupressaceae, Ebenaceae, Moraceae, Geraniaceae, Theaceae, Malvaceae,<br>Hamamelidaceae, Cannabaceae, Aquifoliaceae, Convolvulaceae,<br>Iridaceae, Ericaceae, Cupressaceae, Poaceae, Magnoliaceae,<br>Caprifoliaceae, Vitaceae, Myricaceae, Scrophulariaceae, Plantaginaceae,<br>Salicaceae, Rhamnaceae, Grossulariaceae, Euphorbiaceae, Lauraceae,<br>Staphyleaceae, Tamaricaceae, Taxaceae, Tiliaceae | Pinales, Sapindales, Fagales, Rosales,<br>Ranunculales, Lamiales, Gentianales, Fabales,<br>Asterales, Caryophyllales, Poales, Asparagales,<br>Cornales, Ericales, Geraniales, Malvales,<br>Saxifragales, Aquifoliales, Solanales,<br>Magnoliales, Dipsacales, Vitales, Malpighiales,<br>Laurales, Crossosomatales |
| <i>Orgyia dubia</i>       | Fabaceae, Salicaceae, Fagaceae, Chenopodiaceae, Asteraceae,<br>Polygonaceae, Amaranthaceae, Ephedraceae, Aizoaceae, Tamaricaceae,<br>Cistaceae                                                                                                                                                                                                                                                                                                                                                                                                                                                                                                                                                 | Fabales, Malpighiales, Fagales, Caryophyllales,<br>Asterales, Gnetales, Malvales                                                                                                                                                                                                                                  |
| <i>Orgyia papuana</i>     | Mimosaceae, Verbenaceae, Lauraceae                                                                                                                                                                                                                                                                                                                                                                                                                                                                                                                                                                                                                                                             | Fabales, Lamiales, Laurales                                                                                                                                                                                                                                                                                       |
| <i>Orgyia oslari</i>      | Pinaceae                                                                                                                                                                                                                                                                                                                                                                                                                                                                                                                                                                                                                                                                                       | Pinales                                                                                                                                                                                                                                                                                                           |
| <i>Orgyia tricolor</i>    | Fabaceae, Aizoaceae                                                                                                                                                                                                                                                                                                                                                                                                                                                                                                                                                                                                                                                                            | Fabales, Caryophyllales                                                                                                                                                                                                                                                                                           |
| <i>Orgyia leuschneri</i>  | Aceraceae, Fagaceae                                                                                                                                                                                                                                                                                                                                                                                                                                                                                                                                                                                                                                                                            | Sapindales, Fagales                                                                                                                                                                                                                                                                                               |

---



|                               |                                                                                                                                                                                                                                                                                                                                                                                                                                                   |                                                                                                                                                                                                                                |
|-------------------------------|---------------------------------------------------------------------------------------------------------------------------------------------------------------------------------------------------------------------------------------------------------------------------------------------------------------------------------------------------------------------------------------------------------------------------------------------------|--------------------------------------------------------------------------------------------------------------------------------------------------------------------------------------------------------------------------------|
| <i>Orgyia mixta</i>           | Malvaceae, Fabaceae, Euphorbiaceae, Begoniaceae, Theaceae, Rutaceae, Casuarinaceae, Rubiaceae, Cupressaceae, Rosaceae, Myrtaceae, Geraniaceae, Lythraceae, Pinaceae, Anacardiaceae, Sterculiaceae, Ulmaceae, Poaceae, Rhamnaceae                                                                                                                                                                                                                  | Malvales, Fabales, Malpighiales, Cucurbitales, Ericales, Fagales, Sapindales, Gentianales, Pinales, Rosales, Myrtales, Geraniales, Lamiales, Malvales, Poales                                                                  |
| <i>Orgyia vetusta</i>         | Betulaceae, Asteraceae, Ericaceae, Chenopodiaceae, Fabaceae, Rhamnaceae, Rutaceae, Rosaceae, Polygonaceae, Juglandaceae, Fagaceae, Salicaceae                                                                                                                                                                                                                                                                                                     | Fagales, Asterales, Ericales, Caryophyllales, Fabales, Sapindales, Rosales, Malpighiales                                                                                                                                       |
| <i>Orgyia</i> spp             | Arecaceae                                                                                                                                                                                                                                                                                                                                                                                                                                         | Arecales                                                                                                                                                                                                                       |
| <i>Orgyia postica</i> *       | Anacardiaceae, Bombacaceae, Casuarinaceae, Combretaceae, Fabaceae, Dipterocarpaceae, Euphorbiaceae, Geraniaceae, Lauraceae, Lythraceae, Myrtaceae, Rhamnaceae, Rosaceae, Rubiaceae, Rutaceae, Santalaceae, Sapindaceae, Sterculiaceae, Theaceae, Tiliaceae, Verbenaceae, Pinaceae, Orchidaceae, Cannaceae, Fagaceae, Boraginaceae, Clusiaceae, Iridaceae, Malpighiaceae, Salicaceae, Tamaricaceae, Cupressaceae, Vitaceae, Ulmaceae, Polygonaceae | Sapindales, Malvales, Fagales, Myrtales, Malpighiales, Geraniales, Laurales, Fabales, Rosales, Gentianales, Malvales, Ericales, Lamiales, Pinales, Asparagales, Zingiberales, Boraginales, Caryophyllales, Vitales, Santalales |
| <i>Albarracina warionis</i> * | Ephedraceae                                                                                                                                                                                                                                                                                                                                                                                                                                       | Gnetales                                                                                                                                                                                                                       |

---

|                                     |                                                                                                           |                                                                                                     |
|-------------------------------------|-----------------------------------------------------------------------------------------------------------|-----------------------------------------------------------------------------------------------------|
| <i>Bembina isabellina</i> *         | Poaceae, Lauraceae                                                                                        | Poales, Laurales                                                                                    |
| <i>Bembina atripuncta</i>           | Sterculiaceae                                                                                             | Malvales                                                                                            |
| <i>Bembina apicalis</i>             | Combretaceae                                                                                              | Myrtales                                                                                            |
| <i>Lacida vertiginosa</i> *         | Missing                                                                                                   | Missing                                                                                             |
| <i>Micromorpha linta</i> *          | Combretaceae,Rubiaceae                                                                                    | Myrtales, Gentianales                                                                               |
| <i>Euproctis singapura</i> *        | Missing                                                                                                   | Missing                                                                                             |
| <i>Euproctis pyraustis</i> *        | Missing                                                                                                   | Missing                                                                                             |
| <i>Euproctis fumea</i> *            | Missing                                                                                                   | Missing                                                                                             |
| <i>Euproctis seitzii</i> *          | Missing                                                                                                   | Missing                                                                                             |
| <i>Euproctis latifascia</i>         | Euphorbiaceae, Poaceae, Convolvulaceae, Polygonaceae                                                      | Malpighiales, Poales, Solanales, Caryophyllales                                                     |
| <i>Euproctis subfasciata</i>        | Poaceae                                                                                                   | Poales                                                                                              |
| <i>Euproctis taiwana</i>            | Asteraceae, Iridaceae, Fabaceae, Rubiaceae, Euphorbiaceae, Vitaceae                                       | Asterales, Asparagales, Fabales, Gentianales,<br>Malpighiales, Vitales                              |
| <i>Euproctis varians</i>            | Theaceae, Rutaceae, Brassicaceae, Euphorbiaceae, Poaceae, Fabaceae,<br>Orchidaceae, Arecaceae, Rhamnaceae | Ericales, Sapindales, Brassicales, Malpighiales,<br>Poales, Fabales, Asparagales, Arecales, Rosales |
| <i>Euproctis flavotriangulata</i> * | Juglandaceae                                                                                              | Fagales                                                                                             |
| <i>Euproctis callichlaena</i> *     | Missing                                                                                                   | Missing                                                                                             |

|                             |                                                                                                                                                                                                                                                                                                                                                                                                                                                                                                                                                                                         |                                                                                                                                                                                                                                                                             |
|-----------------------------|-----------------------------------------------------------------------------------------------------------------------------------------------------------------------------------------------------------------------------------------------------------------------------------------------------------------------------------------------------------------------------------------------------------------------------------------------------------------------------------------------------------------------------------------------------------------------------------------|-----------------------------------------------------------------------------------------------------------------------------------------------------------------------------------------------------------------------------------------------------------------------------|
| <i>Somena scintillans</i> * | Poaceae, Asteraceae, Malvaceae, Hippocastanaceae, Euphorbiaceae,<br>Amaranthaceae, Oxalidaceae, Berberidaceae, Brassicaceae,<br>Anacardiaceae, Theaceae, Capparaceae, Solanaceae, Fagaceae,<br>Lauraceae, Rutaceae, Verbenaceae, Rubiaceae, Tiliaceae, Coriariaceae,<br>Cucurbitaceae, Myrtaceae, Moraceae, Malvaceae, Sterculiaceae,<br>Lythraceae, Linaceae, Loranthaceae, Rosaceae, Sapindaceae, Salicaceae,<br>Pedaliaceae, Dipterocarpaceae, Combretaceae, Orchidaceae,<br>Rhamnaceae, Elaeocarpaceae, Hamamelidaceae, Fabaceae,<br>Scrophulariaceae, Tamaricaceae, Passifloraceae | Poales, Asterales, Malvales, Sapindales,<br>Malpighiales, Caryophyllales, Oxalidales,<br>Ranunculales, Brassicales, Ericales, Solanales,<br>Fagales, Laurales, Lamiales, Gentianales,<br>Cucurbitales, Myrtales, Rosales, Santalales,<br>Asparagales, Saxifragales, Fabales |
| <i>Somena kurosawai</i>     | Fabaceae, Theaceae, Rutaceae, Rosaceae                                                                                                                                                                                                                                                                                                                                                                                                                                                                                                                                                  | Fabales, Ericales, Sapindales, Rosales                                                                                                                                                                                                                                      |
| <i>Somena pulverea</i>      | Theaceae, Rosaceae, Fabaceae                                                                                                                                                                                                                                                                                                                                                                                                                                                                                                                                                            | Fabales, Ericales, Rosales                                                                                                                                                                                                                                                  |
| <i>Somena similis</i>       | Anacardiaceae, Euphorbiaceae, Fabaceae                                                                                                                                                                                                                                                                                                                                                                                                                                                                                                                                                  | Fabales, Sapindales, Malpighiales                                                                                                                                                                                                                                           |
| <i>Kidokuga piperita</i> *  | Fagaceae, Euphorbiaceae, Theaceae, Betulaceae, Hamamelidaceae,<br>Clethraceae, Styracaceae, Ericaceae, Aceraceae, Fabaceae, Salicaceae,<br>Caprifoliaceae                                                                                                                                                                                                                                                                                                                                                                                                                               | Fagales, Malpighiales, Ericales, Saxifragales,<br>Sapindales, Fabales, Dipsacales                                                                                                                                                                                           |
| <i>Kidokuga torasan</i>     | Fagaceae                                                                                                                                                                                                                                                                                                                                                                                                                                                                                                                                                                                | Fagales                                                                                                                                                                                                                                                                     |
| <i>Orvasca subnotata</i> *  | Fabaceae, Anacardiaceae, Arecaceae, Cucurbitaceae, Rutaceae,                                                                                                                                                                                                                                                                                                                                                                                                                                                                                                                            | Fabales, Sapindales, Arecales, Cucurbitales,                                                                                                                                                                                                                                |

|                                 |                                                                                                                                                                                                                                                                                        |                                                                                                                                                                          |
|---------------------------------|----------------------------------------------------------------------------------------------------------------------------------------------------------------------------------------------------------------------------------------------------------------------------------------|--------------------------------------------------------------------------------------------------------------------------------------------------------------------------|
|                                 | Cycadaceae, Myrtaceae, Euphorbiaceae, Rhizophoraceae, Sapindaceae,<br>Poaceae, Solanaceae, Sterculiaceae, Sonneratiaceae                                                                                                                                                               | Cycadales, Myrtales, Malpighiales, Poales,<br>Solanales, Malvales                                                                                                        |
| <i>Orvasca bicolor</i>          | Dipterocarpaceae, Euphorbiaceae, Fabaceae                                                                                                                                                                                                                                              | Fabales, Malvales, Malpighiales                                                                                                                                          |
| <i>Orvasca limbata</i>          | Annonaceae, Theaceae, Fabaceae, Melastomataceae, Poaceae                                                                                                                                                                                                                               | Magnoliales, Ericales, Fabales, Myrtales, Poales                                                                                                                         |
| <i>Orvasca aliena</i>           | Rosaceae, Mimosaceae, Vitaceae                                                                                                                                                                                                                                                         | Rosales, Fabales, Vitales                                                                                                                                                |
| <i>Orvasca australis</i>        | Theaceae, Primulaceae, Fabaceae, Geraniaceae, Mimosaceae, Pinaceae,<br>Proteaceae                                                                                                                                                                                                      | Ericales, Fabales, Geraniales, Pinales, Proteales                                                                                                                        |
| <i>Orvasca paradoxa</i>         | Brassicaceae                                                                                                                                                                                                                                                                           | Brassicales                                                                                                                                                              |
| <i>Orvasca taiwana</i>          | Asteraceae, Brassicaceae, Polygonaceae, Rosaceae                                                                                                                                                                                                                                       | Asterales, Brassicales, Caryophyllales, Rosales                                                                                                                          |
| <i>Sphrageidus similis</i> *    | Salicaceae, Fagaceae, Betulaceae, Corylaceae, Rosaceae, Moraceae,<br>Caprifoliaceae, Rhamnaceae, Fabaceae, Paulowniaceae, Ranunculaceae,<br>Rubiaceae, Oleaceae, Polygonaceae, Rutaceae, Juglandaceae,<br>Solanaceae, Poaceae, Grossulariaceae, Amygdaloideae, Adoxaceae,<br>Malvaceae | Malpighiales, Fagales, Rosales, Dipsacales,<br>Fabales, Lamiales, Gentianales, Caryophyllales,<br>Sapindales, Solanales, Poales, Saxifragales,<br>Malvales, Ranunculales |
| <i>Sphrageidus xanthorrhoea</i> | Asteraceae, Euphorbiaceae, Poaceae, Hamamelidaceae, Fabaceae,<br>Lythraceae, Malvaceae, Rubiaceae, Tamaricaceae, Theaceae                                                                                                                                                              | Asterales, Malpighiales, Poales, Saxifragales,<br>Fabales, Myrtales, Malvales, Gentianales,<br>Caryophyllales, Ericales                                                  |

|                                |                                                                                                                                                                            |                                                                                                                                                             |
|--------------------------------|----------------------------------------------------------------------------------------------------------------------------------------------------------------------------|-------------------------------------------------------------------------------------------------------------------------------------------------------------|
| <i>Sphrageidus virguncula</i>  | Anacardiaceae, Brassicaceae, Dioscoreaceae, Euphorbiaceae, Poaceae,<br>Fabaceae, Malvaceae, Nelumbonaceae, Rhamnaceae, Theaceae,<br>Casuarinaceae, Rubiaceae, Tamaricaceae | Sapindales, Brassicales, Dioscoreales, Malvales,<br>Malpighiales, Poales, Fabales, Proteales,<br>Rosales, Ericales, Fagales, Gentianales,<br>Caryophyllales |
| <i>Nygmia marginata</i> *      | Missing                                                                                                                                                                    | Missing                                                                                                                                                     |
| <i>Nygmia quadrangularis</i> * | Missing                                                                                                                                                                    | Missing                                                                                                                                                     |
| <i>Nygmia uniformis</i> *      | Missing                                                                                                                                                                    | Missing                                                                                                                                                     |
| <i>Nygmia javana</i> *         | Rubiaceae                                                                                                                                                                  | Gentianales                                                                                                                                                 |
| <i>Nygmia plana</i> *          | Anacardiaceae, Moraceae, Fagaceae                                                                                                                                          | Sapindales, Rosales, Fagales                                                                                                                                |
| <i>Nygmia staudingeri</i> *    | Missing                                                                                                                                                                    | Missing                                                                                                                                                     |
| <i>Nygmia icilia</i>           | Loranthaceae                                                                                                                                                               | Santalales                                                                                                                                                  |
| <i>Nygmia xanthomela</i>       | Loranthaceae, Dioscoreaceae, Annonaceae, Fabaceae, Rutaceae,<br>Lythraceae, Rosaceae                                                                                       | Santalales, Dioscoreales, Magnoliales, Fabales,<br>Sapindales, Myrtales, Rosales                                                                            |
| <i>Nygmia peperites</i>        | Moraceae                                                                                                                                                                   | Rosales                                                                                                                                                     |
| <i>Nygmia solitaria</i>        | Loranthaceae, Fabaceae                                                                                                                                                     | Santalales, Fabales                                                                                                                                         |
| <i>Nygmia oreosaura</i>        | Sterculiaceae, Apocynaceae, Fabaceae                                                                                                                                       | Malvales, Gentianales, Fabales                                                                                                                              |
| <i>Nygmia bimaculata</i>       | Juglandaceae, Acanthaceae, Loranthaceae                                                                                                                                    | Fagales, Lamiales, Santalales                                                                                                                               |

|                             |                                                                                                                                                                                                                                                                   |                                                                                                                                                                   |
|-----------------------------|-------------------------------------------------------------------------------------------------------------------------------------------------------------------------------------------------------------------------------------------------------------------|-------------------------------------------------------------------------------------------------------------------------------------------------------------------|
| <i>Nygmia atereta</i>       | Fabaceae                                                                                                                                                                                                                                                          | Fabales                                                                                                                                                           |
| <i>Nygmia antiopa</i>       | Betulaceae, Salicaceae, Ulmaceae, Urticaceae                                                                                                                                                                                                                      | Fagales, Malpighiales, Rosales                                                                                                                                    |
| <i>Nygmia fumosa</i>        | Myrtaceae, Euphorbiaceae, Dipterocarpaceae                                                                                                                                                                                                                        | Myrtales, Malpighiales, Malvales                                                                                                                                  |
| <i>Nygmia moalata</i>       | Amaryllidaceae, Asteraceae, Juglandaceae, Rosaceae, Theaceae                                                                                                                                                                                                      | Asparagales, Asterales, Fagales, Rosales,<br>Ericales                                                                                                             |
| <i>Nygmia pelopicta</i>     | Moraceae                                                                                                                                                                                                                                                          | Rosales                                                                                                                                                           |
| <i>Nygmia corbetti</i>      | Euphorbiaceae                                                                                                                                                                                                                                                     | Malpighiales                                                                                                                                                      |
| <i>Arna bipunctapex</i> *   | Euphorbiaceae, Theaceae, Cucurbitaceae, Rosaceae, Myrtaceae,<br>Convolvulaceae, Fagaceae, Moraceae, Fabaceae, Lecythidaceae,<br>Salicaceae, Dipterocarpaceae, Combretaceae, Elaeocarpaceae,<br>Ebenaceae, Hamamelidaceae, Lauraceae, Oleaceae, Rosaceae, Rutaceae | Malpighiales, Ericales, Cucurbitales, Rosales,<br>Myrtales, Solanales, Fagales, Fabales,<br>Malvales, Oxalidales, Saxifragales, Laurales,<br>Lamiales, Sapindales |
| <i>Arna bicostata</i> *     | Missing                                                                                                                                                                                                                                                           | Missing                                                                                                                                                           |
| <i>Arna pseudoconspersa</i> | Theaceae, Rosaceae, Poaceae, Euphorbiaceae, Rutaceae, Ebenaceae                                                                                                                                                                                                   | Ericales, Rosales, Malpighiales, Sapindales,<br>Poales                                                                                                            |
| <i>Arna perplexa</i>        | Rubiaceae                                                                                                                                                                                                                                                         | Gentianales                                                                                                                                                       |
| <i>Arna phaulida</i>        | Combretaceae                                                                                                                                                                                                                                                      | Myrtales                                                                                                                                                          |
| <i>Artaxa rubiginosa</i> *  | Missing                                                                                                                                                                                                                                                           | Missing                                                                                                                                                           |

---

|                                 |                                                                                                                                                                      |                                                                                                       |
|---------------------------------|----------------------------------------------------------------------------------------------------------------------------------------------------------------------|-------------------------------------------------------------------------------------------------------|
| <i>Euproctis cryptosticta</i> * | Euphorbiaceae, Smilacaceae                                                                                                                                           | Malpighiales, Liliales                                                                                |
| <i>Euproctis kanshireia</i> *   | Fagaceae, Rosaceae, Rutaceae, Myrsinaceae, Euphorbiaceae                                                                                                             | Fagales, Rosales, Sapindales, Ericales,<br>Malpighiales                                               |
| <i>Artaxa angulata</i> *        | Fabaceae                                                                                                                                                             | Fabales                                                                                               |
| <i>Artaxa digramma</i> *        | Melastomataceae, Anacardiaceae, Combretaceae, Dipterocarpaceae,<br>Lythraceae, Sapindaceae, Rosaceae, Polygonaceae                                                   | Myrtales, Sapindales, Malvales, Caryophyllales<br>Sapindales, Rosales                                 |
| <i>Artaxa sakaguchii</i>        | Fagaceae                                                                                                                                                             | Fagales                                                                                               |
| <i>Artaxa subflava</i>          | Rosaceae, Ebenaceae, Polygonaceae, Ericaceae, Urticaceae, Theaceae,<br>Euphorbiaceae, Lythraceae, Malvaceae, Rhamnaceae, Rubiaceae                                   | Rosales, Ericales, Caryophyllales, Malpighiales,<br>Myrtales, Malvales, Gentianales                   |
| <i>Artaxa guttata</i>           | Anacardiaceae, Apocynaceae, Combretaceae, Dipterocarpaceae,<br>Euphorbiaceae, Lecythidaceae, Fabaceae, Lythraceae, Myrsinaceae,<br>Oleaceae, Rhamnaceae, Verbenaceae | Sapindales, Gentianales, Myrtales, Malvales,<br>Malpighiales, Ericales, Fabales, Lamiales,<br>Rosales |
| <i>Artaxa pauperata</i>         | Poaceae                                                                                                                                                              | Poales                                                                                                |
| <i>Artaxa ormea</i>             | Euphorbiaceae                                                                                                                                                        | Malpighiales                                                                                          |
| <i>Artaxa flava</i>             | Rosaceae, Ebenaceae, Fagaceae, Punicaceae, Aceraceae, Betulaceae,<br>Cupressaceae, Pinaceae, Anacardiaceae, Euphorbiaceae, Combretaceae,<br>Rubiaceae, Solanaceae    | Rosales, Ericales, Fagales, Myrtales,<br>Sapindales, Pinales, Malpighiales, Gentianales,<br>Solanales |

|                                 |                                                                                                                                                                                                                                                                               |                                                                                                                                                            |
|---------------------------------|-------------------------------------------------------------------------------------------------------------------------------------------------------------------------------------------------------------------------------------------------------------------------------|------------------------------------------------------------------------------------------------------------------------------------------------------------|
| <i>Toxoproctis croceola</i> *   | Juglandaceae                                                                                                                                                                                                                                                                  | Fagales                                                                                                                                                    |
| <i>Toxoproctis cincta</i>       | Nelumbonaceae                                                                                                                                                                                                                                                                 | Proteales                                                                                                                                                  |
| <i>Toxoproctis munda</i>        | Annonaceae, Rubiaceae                                                                                                                                                                                                                                                         | Magnoliales, Gentianales                                                                                                                                   |
| <i>Toxoproctis flavociliata</i> | Euphorbiaceae                                                                                                                                                                                                                                                                 | Malpighiales                                                                                                                                               |
| <i>Toxoproctis bifurcata</i>    | Melastomataceae                                                                                                                                                                                                                                                               | Myrtales                                                                                                                                                   |
| <i>Euproctis montis</i>         | Rosaceae, Vitaceae, Rutaceae, Moraceae, Theaceae, Solanaceae                                                                                                                                                                                                                  | Rosales, Vitales, Sapindales, Ericales, Solanales                                                                                                          |
| <i>Euproctis collenettei</i> *  | Missing                                                                                                                                                                                                                                                                       | Missing                                                                                                                                                    |
| <i>Euproctis ?aureoplaga</i> *  | Missing                                                                                                                                                                                                                                                                       | Missing                                                                                                                                                    |
| <i>Euproctis molunduana</i> *   | Missing                                                                                                                                                                                                                                                                       | Missing                                                                                                                                                    |
| <i>Euproctis ionthana</i> *     | Missing                                                                                                                                                                                                                                                                       | Missing                                                                                                                                                    |
| <i>Euproctis ?putris</i> *      | Missing                                                                                                                                                                                                                                                                       | Missing                                                                                                                                                    |
| <i>Euproctis chrysorrhoea</i> * | Rosaceae, Fabaceae, Aceraceae, Asteraceae, Betulaceae, Juglandaceae,<br>Fagaceae, Oleaceae, Geraniaceae, Elaeagnaceae, Myricaceae, Vitaceae,<br>Plantaginaceae, Salicaceae, Polygonaceae, Grossulariaceae,<br>Caprifoliaceae, Tiliaceae, Ulmaceae, Rutaceae, Hippocastanaceae | Rosales, Fabales, Sapindales, Asterales,<br>Fagales, Geraniales, Vitales, Lamiales,<br>Malpighiales, Caryophyllales, Saxifragales,<br>Dipsacales, Malvales |
| <i>Euproctis karghalica</i> *   | Salicaceae, Elaeagnaceae, Moraceae, Rosaceae                                                                                                                                                                                                                                  | Rosales, Malpighiales                                                                                                                                      |



|                               |               |              |
|-------------------------------|---------------|--------------|
| <i>Euproctis conistica</i> *  | Missing       | Missing      |
| <i>Euproctis yunnanpina</i> * | Pinaceae      | Pinales      |
| <i>Euproctis magna</i> *      | Missing       | Missing      |
| <i>Nygmia inornata</i> *      | Euphorbiaceae | Malpighiales |
| <i>Euproctis ?serrula</i> *   | Missing       | Missing      |

---

Note: “\*” refers to the taxa occurring in the Lymantriinae phylogeny of Wang et al. (2015).
