# Supplementary material for: Polyphagy and diversification in tussock moths: Support for the oscillation hypothesis from extreme generalists
Source: PubMed Central journal article supplement (PMC5632610; doi:10.1002/ece3.3350), 2017-08-30
Supplement: ECE3-7-7975-s003.pdf [file ECE3-7-7975-s003.pdf]

Table S2. Species numbers of Lymantriinae genus-level taxa and the number of host plant orders used.

| Genus names<br>(Lymantriinae)        | Species numbers<br>(Lymantriinae) | Order numbers<br>(Host plants) |
|--------------------------------------|-----------------------------------|--------------------------------|
| <i>Daplasa</i>                       | 5                                 | unknown                        |
| <i>Arctornis</i>                     | 155                               | 14                             |
| <i>Ruanda</i>                        | 3                                 | 1                              |
| <i>Eloria</i>                        | 70                                | 5                              |
| <i>Euproctoides</i>                  | 5                                 | unknown                        |
| <i>Locharna</i>                      | 5                                 | 5                              |
| <i>Kuromondokuga</i>                 | 4                                 | 4                              |
| <i>Pida</i>                          | 13                                | 1                              |
| <i>Leucoma</i>                       | 46                                | 12                             |
| " <i>Leucoma</i> " <i>sericea</i>    | 1                                 | 2                              |
| <i>Perina</i>                        | 6                                 | 3                              |
| " <i>Leucoma</i> " <i>chrysocele</i> | 1                                 | unknown                        |
| <i>Ivela</i>                         | 3                                 | 4                              |
| <i>Olapa</i>                         | 18                                | 4                              |
| <i>Caviria</i>                       | 13                                | 8                              |
| <i>Thagona</i>                       | 39                                | 6                              |
| <i>Imaus</i>                         | 2                                 | unknown                        |
| <i>Cispia</i>                        | 13                                | 2                              |
| <i>Dura</i>                          | 25                                | unknown                        |
| <i>Crorema</i>                       | 17                                | 2                              |
| <i>Sarsina</i>                       | 7                                 | 3                              |

|                                   |     |         |
|-----------------------------------|-----|---------|
| <i>Lymantria</i>                  | 170 | 34      |
| <i>Aroa</i>                       | 18  | 5       |
| <i>Hemerophanes</i>               | 6   | 1       |
| <i>Ilema</i>                      | 30  | 16      |
| <i>Mylantria</i>                  | 1   | 4       |
| <i>Griveaudyria</i>               | 2   | 1       |
| <i>Calliteara</i>                 | 45  | 28      |
| <i>Laelia</i>                     | 100 | 6       |
| <i>Pantana</i>                    | 33  | 1       |
| <i>Neomardara</i>                 | 2   | unknown |
| <i>"Olene" &amp; "Telochurus"</i> | 11  | 5       |
| <i>Cifuna</i>                     | 5   | 9       |
| <i>Dasychira</i>                  | 16  | 10      |
| <i>Psalis</i>                     | 11  | 11      |
| <i>Teia</i>                       | 18  | 21      |
| <i>Olene</i>                      | 26  | 25      |
| <i>Orgyia</i>                     | 62  | 38      |
| <i>Albaraccina</i>                | 2   | 1       |
| <i>Bembina</i>                    | 6   | 4       |
| <i>Lacida</i>                     | 7   | unknown |
| <i>Micromorphe</i>                | 6   | 2       |
| <i>"Euproctis"1</i>               | 20  | 14      |
| <i>"Euproctis"2</i>               | 1   | 1       |
| <i>"Euproctis"3</i>               | 1   | unknown |
| <i>Somena</i>                     | 6   | 22      |
| <i>Kidokuga</i>                   | 2   | 7       |

|                    |    |    |
|--------------------|----|----|
| <i>Orvasca</i>     | 28 | 20 |
| <i>Sphrageidus</i> | 3  | 20 |
| <i>Nygmia</i>      | 55 | 15 |
| <i>Arna</i>        | 14 | 16 |
| <i>Artaxa</i>      | 33 | 15 |
| <i>Toxoproctis</i> | 30 | 11 |
| <i>Euproctis</i>   | 9  | 14 |

---

Table S3. Most polyphagous species in each contrast in Table 2

| <b>Sister pairing</b>                             | <b>MP1</b>                  | <b>HR1</b> | <b>MP2</b>                 | <b>HR2</b> |
|---------------------------------------------------|-----------------------------|------------|----------------------------|------------|
| <i>Somena-Kidokuga</i>                            | <i>S. scintillans</i>       | 22         | <i>K. piperita</i>         | 7          |
| <i>(Arna+Artaxa+Toxoproctis+Euproctis)-Nygmia</i> | <i>Arna bipunctapex</i>     | 14         | <i>N. xanthomela</i>       | 7          |
| <i>Calliteara-Griveaudyria</i>                    | <i>C. horsfieldi</i>        | 18         | <i>G. ila</i>              | 1          |
| <i>Laelia-Pantana</i>                             | <i>L. coenosa</i>           | 4          | <i>P. substrigosa</i> etc. | 1          |
| <i>Orgyia-Olene</i>                               | <i>O. leucostigma</i>       | 25         | <i>O. mendosa</i>          | 20         |
| <i>Aroa-Hemerophanes</i>                          | <i>A. difficilis</i> etc.   | 2          | <i>H. enos</i> etc.        | 1          |
| <i>Lymantria-(Sarsina+Crorema)</i>                | <i>L. dispar</i>            | 25         | <i>S. violascens</i>       | 3          |
| <i>Leucoma-(Ivela+Perina+?Leucoma)</i>            | <i>L. salicis</i>           | 6          | <i>P. nuda</i>             | 3          |
| <i>(Locharna+Kuromondokuga)-Pida</i>              | <i>L. strigipennis</i> etc. | 4          | <i>Pida spp.</i>           | 1          |
| <i>Eloria-Ruanda</i>                              | <i>E. torrida</i> etc.      | 3          | <i>R. nuda</i>             | 1          |

Notes: MP1 = Most polyphagous species in clade with highest total host diversity, with its host range HR1 (number of orders);

MP2 = Most polyphagous species in clade with lowest host diversity, with its host range HR2
