# Supplementary material for: Polyphagy and diversification in tussock moths: Support for the oscillation hypothesis from extreme generalists
Source: PubMed Central journal article supplement (PMC5632610; doi:10.1002/ece3.3350), 2017-08-30
Supplement: ECE3-7-7975-s004.pdf [file ECE3-7-7975-s004.pdf]

Table S4. Host use in Lymantriinae and its closest relatives

| Subfamily    | Genus                    | Total  | Max | #records | #3+ | % 3+ | #7+ | % 7+ |
|--------------|--------------------------|--------|-----|----------|-----|------|-----|------|
|              |                          | orders | pol |          |     |      |     |      |
| Lymantriinae | <i>Arctornis</i>         | 14     | 5   | 27       | 3   | 11%  | 0   | 0%   |
|              | <i>Ruanda</i>            | 1      | 1   | 1        | 0   | 0%   | 0   | 0%   |
|              | <i>Eloria</i>            | 5      | 3   | 8        | 2   | 25%  | 0   | 0%   |
|              | <i>Locharna</i>          | 5      | 4   | 2        | 1   | 50%  | 0   | 0%   |
|              | <i>Kuromondokuga</i>     | 4      | 4   | 2        | 1   | 50%  | 0   | 0%   |
|              | <i>Pida</i>              | 1      | 1   | 1        | 0   | 0%   | 0   | 0%   |
|              | <i>Leucoma</i>           | 12     | 6   | 8        | 3   | 38%  | 0   | 0%   |
|              | <i>"Leucoma" sericea</i> | 2      | 2   | 1        | 0   | 0%   | 0   | 0%   |
|              | <i>Perina</i>            | 3      | 3   | 2        | 1   | 50%  | 0   | 0%   |
|              | <i>Ivela</i>             | 4      | 2   | 3        | 0   | 0%   | 0   | 0%   |
|              | <i>Olapa</i>             | 4      | 2   | 5        | 0   | 0%   | 0   | 0%   |
|              | <i>Caviria</i>           | 8      | 4   | 1        | 1   | 100% | 0   | 0%   |
|              | <i>Thagona</i>           | 6      | 4   | 4        | 1   | 25%  | 0   | 0%   |
|              | <i>Cispia</i>            | 2      | 1   | 4        | 0   | 0%   | 0   | 0%   |
|              | <i>Crorema</i>           | 2      | 1   | 2        | 0   | 0%   | 0   | 0%   |
|              | <i>Sarsina</i>           | 3      | 3   | 3        | 1   | 33%  | 0   | 0%   |
|              | <i>Lymantria</i>         | 34     | 25  | 53       | 18  | 34%  | 7   | 13%  |
|              | <i>Aroa</i>              | 5      | 2   | 5        | 0   | 0%   | 0   | 0%   |
|              | <i>Hemerophanes</i>      | 1      | 1   | 2        | 0   | 0%   | 0   | 0%   |
|              | <i>Ilema</i>             | 16     | 8   | 9        | 5   | 56%  | 1   | 11%  |
|              | <i>Mylantria</i>         | 4      | 4   | 1        | 1   | 100% | 0   | 0%   |
|              | <i>Griveaudyria</i>      | 1      | 1   | 1        | 0   | 0%   | 0   | 0%   |
|              | <i>Calliteara</i>        | 28     | 18  | 23       | 7   | 30%  | 4   | 17%  |

|            |                       |    |    |    |    |      |    |      |
|------------|-----------------------|----|----|----|----|------|----|------|
|            | <i>Laelia</i>         | 6  | 4  | 16 | 1  | 6%   | 0  | 0%   |
|            | <i>Pantana</i>        | 1  | 1  | 10 | 0  | 0%   | 0  | 0%   |
|            | " <i>Olene</i> "      |    |    |    |    |      |    |      |
|            | " <i>Telochurus</i> " | 5  | 2  | 2  | 0  | 0%   | 0  | 0%   |
|            | <i>Cifuna</i>         | 9  | 9  | 1  | 1  | 100% | 1  | 100% |
|            | <i>Dasychira</i>      | 10 | 7  | 14 | 8  | 57%  | 1  | 7%   |
|            | <i>Psalis</i>         | 11 | 11 | 1  | 1  | 100% | 1  | 100% |
|            | <i>Teia</i>           | 21 | 17 | 7  | 4  | 57%  | 1  | 14%  |
|            | <i>Olene</i>          | 25 | 20 | 2  | 2  | 100% | 2  | 100% |
|            | <i>Orgyia</i>         | 38 | 25 | 36 | 24 | 67%  | 10 | 28%  |
|            | <i>Albarracina</i>    | 1  | 1  | 1  | 0  | 0%   | 0  | 0%   |
|            | <i>Bembina</i>        | 4  | 2  | 3  | 0  | 0%   | 0  | 0%   |
|            | <i>Micromorphe</i>    | 2  | 2  | 1  | 0  | 0%   | 0  | 0%   |
|            | <i>Euproctis_1</i>    | 14 | 9  | 4  | 3  | 75%  | 1  | 25%  |
|            | <i>Euproctis_2</i>    | 1  | 1  | 1  | 0  | 0%   | 0  | 0%   |
|            | <i>Somena</i>         | 22 | 22 | 4  | 4  | 100% | 1  | 25%  |
|            | <i>Kidokuga</i>       | 7  | 7  | 2  | 1  | 50%  | 1  | 50%  |
|            | <i>Orvasca</i>        | 20 | 10 | 7  | 6  | 86%  | 1  | 14%  |
|            | <i>Sphrageidus</i>    | 20 | 14 | 3  | 3  | 100% | 3  | 100% |
|            | <i>Nygmia</i>         | 15 | 7  | 14 | 7  | 50%  | 1  | 7%   |
|            | <i>Arna</i>           | 16 | 14 | 4  | 2  | 50%  | 1  | 25%  |
|            | <i>Artaxa</i>         | 15 | 9  | 10 | 5  | 50%  | 3  | 30%  |
|            | <i>Toxoproctis</i>    | 11 | 5  | 6  | 1  | 17%  | 0  | 0%   |
|            | <i>Euproctis</i>      | 14 | 13 | 4  | 1  | 25%  | 1  | 25%  |
| Hypheninae | <i>Colobochyla</i>    | 1  | 1  | 2  | 0  | 0%   | 0  | 0%   |
|            | <i>Hypena</i>         | 18 | 11 | 76 | 6  | 8%   | 1  | 1%   |

|              |                         |    |    |    |    |     |   |     |
|--------------|-------------------------|----|----|----|----|-----|---|-----|
| Pangraptinae | <i>Episparis</i>        | 3  | 2  | 3  | 0  | 0%  | 0 | 0%  |
|              | <i>Gracilodes</i>       | 2  | 1  | 2  | 0  | 0%  | 0 | 0%  |
|              | <i>Pangrapta</i>        | 6  | 1  | 13 | 0  | 0%  | 0 | 0%  |
| Herminiinae  | <i>Idia</i>             | 7  | 3  | 5  | 1  | 20% | 0 | 0%  |
|              | <i>Paracolax</i>        | 2  | 2  | 6  | 0  | 0%  | 0 | 0%  |
|              | <i>Polypogon</i>        | 6  | 4  | 3  | 1  | 33% | 0 | 0%  |
|              | <i>Herminia</i>         | 9  | 5  | 5  | 2  | 40% | 0 | 0%  |
|              | <i>Simplicia</i>        | 17 | 8  | 10 | 5  | 50% | 1 | 10% |
|              | <i>Nodaria</i>          | 5  | 3  | 3  | 1  | 33% | 0 | 0%  |
| Aganainae    | <i>Mecodina</i>         | 4  | 2  | 5  | 0  | 0%  | 0 | 0%  |
|              | <i>Psimada</i>          | 1  | 1  | 1  | 0  | 0%  | 0 | 0%  |
|              | <i>Neochera</i>         | 1  | 1  | 1  | 0  | 0%  | 0 | 0%  |
|              | <i>Asota</i>            | 12 | 11 | 15 | 2  | 13% | 1 | 7%  |
|              | <i>Peridrome</i>        | 1  | 1  | 1  | 0  | 0%  | 0 | 0%  |
| Arctiinae    | <i>Cyana</i>            | 7  | 5  | 3  | 1  | 33% | 0 | 0%  |
|              | <i>Amerila</i>          | 14 | 6  | 12 | 3  | 25% | 0 | 0%  |
|              | <i>Dysauxes</i>         | 2  | 2  | 2  | 0  | 0%  | 0 | 0%  |
|              | <i>Apisa</i>            | 1  | 1  | 1  | 0  | 0%  | 0 | 0%  |
|              | <i>Syntomis (Amata)</i> | 23 | 8  | 23 | 11 | 48% | 2 | 9%  |
|              | <i>Ctenucha</i>         | 5  | 2  | 5  | 0  | 0%  | 0 | 0%  |
|              | <i>Antichloris</i>      | 2  | 2  | 3  | 0  | 0%  | 0 | 0%  |
|              | <i>Coscinia</i>         | 5  | 4  | 3  | 2  | 67% | 0 | 0%  |
|              | <i>Pseudophaloe</i>     | 1  | 1  | 1  | 0  | 0%  | 0 | 0%  |
|              | <i>Dysschema</i>        | 19 | 13 | 18 | 6  | 33% | 3 | 17% |
|              | <i>Callimorpha</i>      | 9  | 8  | 4  | 2  | 50% | 1 | 25% |
|              | <i>Nyctemera</i>        | 13 | 4  | 16 | 3  | 19% | 0 | 0%  |

|                               |        |        |   |   |        |   |        |
|-------------------------------|--------|--------|---|---|--------|---|--------|
| <i>Cretonotos</i>             | 20     | 20     | 6 | 4 | 67%    | 2 | 33%    |
| <i>Arctia</i>                 | 20     | 18     | 4 | 3 | 75%    | 1 | 25%    |
| Lymantriinae (Average)        | 9.8    | 6.9    |   |   | 37%    |   | 15%    |
| Related subfamilies (Average) | 7.9    | 5.0    |   |   | 20%    |   | 4%     |
| t-test                        | p=0.32 | p=0.20 |   |   | p<0.05 |   | p=0.05 |

---

Notes: Total number of host orders used in each genus, followed by: Max pol = number of orders used by most polyphagous species; #records = number of species with host records; #3+ and %3+ = number and percentage of species out of these feeding on at least three orders; #7+ and %7+ = respectively for feeding on at least seven host orders. T-tests compare levels of polyphagy in Lymantriinae with related subfamilies.

Table S5. Feeding habits of adults and flight abilities of female adults in selected erebid moths

| Subfamily    | Tribe      | Genus               | Feeding/Nonfeeding | Female flight abilities |
|--------------|------------|---------------------|--------------------|-------------------------|
| unassigned   | unassigned | <i>Cultripalpa</i>  | Feeding            | Flight                  |
| unassigned   | unassigned | <i>Colobochyla</i>  | Feeding            | flight                  |
| Hypeninae    | unassigned | <i>Hypena</i>       | Feeding            | flight                  |
| Pangraptinae | unassigned | <i>Masca</i>        | Feeding            | Flight                  |
| Pangraptinae | unassigned | <i>Epidparis</i>    | Feeding            | Flight                  |
| Pangraptinae | unassigned | <i>Gracilodes</i>   | Feeding            | Flight                  |
| Pangraptinae | unassigned | <i>Hyposemansis</i> | Feeding            | Flight                  |
| Pangraptinae | unassigned | <i>Chrysograpta</i> | Feeding            | Flight                  |
| Pangraptinae | unassigned | <i>Pangrapta</i>    | Feeding            | Flight                  |
| unassigned   | unassigned | <i>Schistorhynx</i> | Feeding            | Flight                  |
| Herminiinae  | unassigned | <i>Idia</i>         | feeding            | Flight                  |
| Herminiinae  | unassigned | <i>Paracolax</i>    | Feeding            | Flight                  |
| Herminiinae  | unassigned | <i>Polypogon</i>    | Feeding            | Flight                  |
| Herminiinae  | unassigned | <i>Herminia</i>     | Feeding            | Flight                  |
| Herminiinae  | unassigned | <i>Lysimelia</i>    | Feeding            | Flight                  |
| Herminiinae  | unassigned | <i>Simplicia</i>    | Feeding            | Flight                  |
| Herminiinae  | unassigned | <i>Nodaria</i>      | Feeding            | Flight                  |
| Aganainae    | unassigned | <i>Mecodina</i>     | Feeding            | Flight                  |
| Aganainae    | unassigned | <i>Psimada</i>      | Feeding            | Flight                  |
| Aganainae    | Aganaini   | <i>Neochera</i>     | Feeding            | Flight                  |
| Aganainae    | Aganaini   | <i>Asota</i>        | Feeding            | Flight                  |
| Aganainae    | Aganaini   | <i>Euplocia</i>     | Feeding            | Flight                  |
| Aganainae    | Aganaini   | <i>Peridrome</i>    | Feeding            | Flight                  |
| Arctiinae    | Lithosiini | <i>Garudinia</i>    | Unknown            | Flight                  |

|              |               |                                                                               |                    |            |
|--------------|---------------|-------------------------------------------------------------------------------|--------------------|------------|
| Arctiinae    | Lithosiini    | <i>Eugoa</i>                                                                  | Unknown            | Flight     |
| Arctiinae    | Lithosiini    | <i>Brunia</i>                                                                 | Unknown            | Flight     |
| Arctiinae    | Lithosiini    | <i>Cyana</i>                                                                  | Unknown            | Flight     |
| Arctiinae    | Lithosiini    | <i>Barsine</i>                                                                | Unknown            | Flight     |
| Arctiinae    | Amerilini     | <i>Amerila</i>                                                                | Feeding/nonfeeding | Flight     |
| Arctiinae    | Syntomini     | <i>Dysauxes</i>                                                               | Unknown            | Flight     |
| Arctiinae    | Syntomini     | <i>Apisa</i>                                                                  | Unknown            | Flight     |
| Arctiinae    | Syntomini     | <i>Syntomis</i>                                                               | Unknown            | Flightless |
| Arctiinae    | Arctiini      | <i>Ctenucha</i>                                                               | Unknown            | Flight     |
| Arctiinae    | Arctiini      | <i>Antichloris</i>                                                            | Unknown            | Flight     |
| Arctiinae    | Arctiini      | <i>Coscinia</i>                                                               | Unknown            | Flightless |
| Arctiinae    | Arctiini      | <i>Pseudophaloe</i>                                                           | Unknown            | Flight     |
| Arctiinae    | Arctiini      | <i>Dysschema</i>                                                              | Nonfeeding         | Flight     |
| Arctiinae    | Arctiini      | <i>Callimorpha</i>                                                            | Unknown            | Flight     |
| Arctiinae    | Arctiini      | <i>Nyctemera</i>                                                              | Feeding            | Flight     |
| Arctiinae    | Arctiini      | <i>Cretonotos</i>                                                             | Nonfeeding         | Flight     |
| Arctiinae    | Arctiini      | <i>Arctia</i>                                                                 | Unknown            | Flight     |
| Lymantriinae | Daplasini     | <i>Daplasa</i>                                                                | Nonfeeding         | Flight     |
|              |               | <i>Arctornis</i>                                                              |                    |            |
| Lymantriinae | Arctornithini | (incl. " <i>Sitvia</i> ",<br>" <i>Topemesoides</i> ",<br>" <i>Carriola</i> ") | Nonfeeding         | Flight     |
| Lymantriinae | Locharnini    | <i>Ruanda</i>                                                                 | Nonfeeding         | Flight     |
| Lymantriinae | Locharnini    | <i>Eloria</i>                                                                 | Nonfeeding         | Flight     |
| Lymantriinae | Locharnini    | <i>Euproctoides</i>                                                           | Nonfeeding         | Flight     |
| Lymantriinae | Locharnini    | <i>Locharna</i>                                                               | Nonfeeding         | Flight     |
| Lymantriinae | Locharnini    | <i>Kuromondokuga</i>                                                          | Nonfeeding         | Flight     |

---

|              |             |                          |            |            |
|--------------|-------------|--------------------------|------------|------------|
| Lymantriinae | Locharnini  | <i>Pida</i>              | Nonfeeding | Flight     |
| Lymantriinae | Leucomini   | <i>Leucoma</i>           | Nonfeeding | Flight     |
| Lymantriinae | Leucomini   | <i>"Leucoma" sericea</i> | Nonfeeding | Flight     |
| Lymantriinae | Leucomini   | <i>Perina</i>            | Nonfeeding | Flight     |
| Lymantriinae | Leucomini   | <i>Ivela</i>             | Nonfeeding | Flight     |
| Lymantriinae | Lymantriini | <i>Olapa</i>             | Nonfeeding | Flight     |
| Lymantriinae | Lymantriini | <i>Caviria</i>           | Nonfeeding | Flight     |
| Lymantriinae | Lymantriini | <i>Thagona</i>           | Nonfeeding | Flight     |
| Lymantriinae | Lymantriini | <i>Imaus</i>             | Nonfeeding | Flight     |
| Lymantriinae | Lymantriini | <i>Cispia</i>            | Nonfeeding | Flight     |
| Lymantriinae | Lymantriini | <i>Dura</i>              | Nonfeeding | Flight     |
| Lymantriinae | Lymantriini | <i>Crorema</i>           | Nonfeeding | Flight     |
| Lymantriinae | Lymantriini | <i>Sarsina</i>           | Nonfeeding | Flight     |
| Lymantriinae | Lymantriini | <i>Lymantria</i>         | Nonfeeding | Flightless |
| Lymantriinae | Orgyiini    | <i>Aroa</i>              | Nonfeeding | Flightless |
| Lymantriinae | Orgyiini    | <i>Hemerophanes</i>      | Nonfeeding | Flight     |
| Lymantriinae | Orgyiini    | <i>Ilema</i>             | Nonfeeding | Flight     |
| Lymantriinae | Orgyiini    | <i>Mylantria</i>         | Nonfeeding | Flight     |
| Lymantriinae | Orgyiini    | <i>Griveaudyria</i>      | Nonfeeding | Flight     |
| Lymantriinae | Orgyiini    | <i>Calliteara</i>        | Nonfeeding | Flight     |
| Lymantriinae | Orgyiini    | <i>Laelia</i>            | Nonfeeding | Flightless |
| Lymantriinae | Orgyiini    | <i>Pantana</i>           | Nonfeeding | Flight     |
| Lymantriinae | Orgyiini    | <i>Neomardara</i>        | Nonfeeding | Flight     |
| Lymantriinae | Orgyiini    | <i>Telochurus</i>        | Nonfeeding | Flightless |
| Lymantriinae | Orgyiini    | <i>Cifuna</i>            | Nonfeeding | Unkown     |
| Lymantriinae | Orgyiini    | <i>Dasychira</i>         | Nonfeeding | Flight     |
| Lymantriinae | Orgyiini    | <i>Psalis</i>            | Nonfeeding | Flight     |

---

|              |          |                    |            |                     |
|--------------|----------|--------------------|------------|---------------------|
| Lymantriinae | Orgyiini | <i>Teia</i>        | Nonfeeding | Flightless          |
| Lymantriinae | Orgyiini | <i>Olene</i>       | Nonfeeding | Flight & flightless |
| Lymantriinae | Orgyiini | <i>Orgyia</i>      | Nonfeeding | Flightless          |
| Lymantriinae | Nygmiini | <i>Albarracina</i> | Nonfeeding | Flight              |
| Lymantriinae | Nygmiini | <i>Bembina</i>     | Nonfeeding | Flight              |
| Lymantriinae | Nygmiini | <i>Lacida</i>      | Nonfeeding | Flight              |
| Lymantriinae | Nygmiini | <i>Micromorphe</i> | Nonfeeding | Flight              |
| Lymantriinae | Nygmiini | <i>Euproctis_1</i> | Nonfeeding | Flight              |
| Lymantriinae | Nygmiini | <i>Euproctis_2</i> | Nonfeeding | Flight              |
| Lymantriinae | Nygmiini | <i>Euproctis_3</i> | Nonfeeding | Flight              |
| Lymantriinae | Nygmiini | <i>Somena</i>      | Nonfeeding | Flight              |
| Lymantriinae | Nygmiini | <i>Kidokuga</i>    | Nonfeeding | Flight              |
| Lymantriinae | Nygmiini | <i>Orvasca</i>     | Nonfeeding | Flight              |
| Lymantriinae | Nygmiini | <i>Sphrageidus</i> | Nonfeeding | Flight              |
| Lymantriinae | Nygmiini | <i>Nygmia</i>      | Nonfeeding | Flight              |
| Lymantriinae | Nygmiini | <i>Arna</i>        | Nonfeeding | Flight              |
| Lymantriinae | Nygmiini | <i>Artaxa</i>      | Nonfeeding | Flight              |
| Lymantriinae | Nygmiini | <i>Toxoproctis</i> | Nonfeeding | Flight              |
| Lymantriinae | Nygmiini | <i>Euproctis</i>   | Nonfeeding | Flight              |

---



Table S6. Host plant use of Erebid taxa in the oriental tropics

| Subfamilies      | Tribes     | Subtribes  | Numbers of host plant genera with the plant family names                                                                                                                                                       |
|------------------|------------|------------|----------------------------------------------------------------------------------------------------------------------------------------------------------------------------------------------------------------|
| (Erebidae)       | (Erebidae) | (Erebidae) |                                                                                                                                                                                                                |
| Aganainae        | -          | -          | 18 Moraceae; 6 Apocynaceae; 2 Meliaceae; 1 Asclepiadaceae, Asteraceae, Caricaceae, Clusiaceae, Dipterocarpaceae, Euphorbiaceae, Fabaceae, Myrtaceae, Oxalidaceae, Rubiaceae, Solanaceae, Theaceae, Verbenaceae |
| Pangraptinae     | -          | -          | 12 Rubiaceae; 2 Oleaceae; 1 Magnoliaceae, Meliaceae, Sapindaceae, Smilacaceae                                                                                                                                  |
| Calpinae         | -          | -          | 42 Menispermaceae; 3 Sapindaceae; 1 Amaranthaceae, Clusiaceae, Fabaceae, Lardizabalaceae, Sterculiaceae                                                                                                        |
| Scoliopteryginae | -          | -          | 37 Malvaceae*; 7 Sterculiaceae*; 5 Fabaceae; 3 Bombacaceae*, Tiliaceae*; 2 Euphorbiaceae; 1 Amaranthaceae, Convolvulaceae, Menispermaceae; Moraceae, Rosaceae, Rubiaceae, Solanaceae, Verbenaceae              |
| Erebinae         | Hulodini   | -          | 19 Fabaceae; 2 Nyctaginaceae, Rubiaceae; 1 Acanthaceae, Adiantaceae, Apocynaceae, Dipterocarpaceae, Lythraceae, Rutaceae, Theaceae                                                                             |
| Erebinae         | Hypopyrini | -          | 7 Fabaceae; 1 Theaceae, Vitaceae                                                                                                                                                                               |

|          |              |   |                                                                                                                                                                                                                                                                                                                                                                                                                                                                                                     |
|----------|--------------|---|-----------------------------------------------------------------------------------------------------------------------------------------------------------------------------------------------------------------------------------------------------------------------------------------------------------------------------------------------------------------------------------------------------------------------------------------------------------------------------------------------------|
| Erebinae | Pandesmini   | - | 5 Fabaceae; 1 Salicaceae, Sapindaceae                                                                                                                                                                                                                                                                                                                                                                                                                                                               |
| Erebinae | Pericymini   | - | 9 Fabaceae; 1 Rubiaceae, Sapindaceae                                                                                                                                                                                                                                                                                                                                                                                                                                                                |
| Erebinae | Erebini      | - | 8 Fabaceae; 2 Smilacaceae; 1 Malvaceae                                                                                                                                                                                                                                                                                                                                                                                                                                                              |
| Erebinae | Euclidiini   | - | 23 Fabaceae; 11 Poaceae; 2 Sapindaceae; 1 Araceae, Cyperaceae, Dipterocarpaceae,<br>Euphorbiaceae, Malvaceae, Rubiaceae, Solanaceae, Zingiberaceae                                                                                                                                                                                                                                                                                                                                                  |
| Erebinae | Coccytiini   | - | 16 Sapindaceae; 1 Arecaceae, Tiliaceae, Verbenaceae, Vitaceae                                                                                                                                                                                                                                                                                                                                                                                                                                       |
| Erebinae | Ophiusini    | - | 12 Combretaceae; 4 Myrtaceae; 2 Anacardiaceae, Dipterocarpaceae, Lecythidaceae, Pinaceae,<br>Rosaceae, Vitaceae; 1 Euphorbiaceae, Fagaceae, Geraniaceae, Lauraceae, Menispermaceae,<br>Sapindaceae, Verbenaceae                                                                                                                                                                                                                                                                                     |
| Erebinae | Poaphilini   | - | 30 Euphorbiaceae; 14 Fabaceae; 9 Sapotaceae; 6 Sapindaceae; 4 Rhamnaceae; 3 Rubiaceae; 2<br>Araucariaceae, Brassicaceae, Celastraceae, Convolvulaceae, Coriariaceae, Poaceae, Rosaceae,<br>Rutaceae, Sterculiaceae, Tamaricaceae; 1 Anacardiaceae, Cucurbitaceae, Cupressaceae,<br>Dipterocarpaceae, Ebenaceae, Geraniaceae, Lecythidaceae, Linaceae, Loganiaceae, Lythraceae,<br>Meliaceae, Moraceae, Polypodiaceae, Polygonaceae, Proteaceae, Solanaceae, Tiliaceae, Vitaceae,<br>Zygophyllaceae. |
| Erebidae | Ommatophorin | - | 1 Fabaceae                                                                                                                                                                                                                                                                                                                                                                                                                                                                                          |

---

|               |               |   |                                                                                                                                                                                   |
|---------------|---------------|---|-----------------------------------------------------------------------------------------------------------------------------------------------------------------------------------|
| Erebidae      | Acantholipini | - | 2 Fabaceae, 1 Connaraceae                                                                                                                                                         |
| Erebidae      | Catephiini    | - | 1 Combretaceae, Lythraceae                                                                                                                                                        |
| Erebidae      | Catocalini    | - | 1 Fagaceae, Oleaceae, Solanaceae                                                                                                                                                  |
| Erebidae      | Sypnini       | - | 2 Rosaceae; 1 Fagaceae                                                                                                                                                            |
| Erebidae      | Ercheiini     | - | 2 Poaceae; 1 Asparagaceae, Brassicaceae, Fabaceae, Poaceae, Tiliaceae                                                                                                             |
| Erebidae      | Amphigoniini  | - | No records                                                                                                                                                                        |
| Anobinae      | -             | - | 16 Fabaceae; 1 Poaceae                                                                                                                                                            |
| Eulepidotinae | -             | - | 8 Fabaceae; 4 Poaceae; 1 Cucurbitaceae                                                                                                                                            |
| Hypocallinae  | -             | - | 7 Ebenaceae; 3 Fagaceae; 2 Fabaceae, Meliaceae, Rutaceae; 1 Anacardiaceae, Euphorbiaceae,<br>Lecythidaceae, Sapindaceae, Sapotaceae, Clusiaceae, Rosaceae                         |
| Tinoliinae    | -             | - | 12 Acanthaceae; 1 Rhamnaceae                                                                                                                                                      |
| Rivulinae     | -             | - | 5 Poaceae; 2 Marantaceae; 1 Anacardiaceae                                                                                                                                         |
| Hypeninae     | -             | - | 16 Fabaceae; 7 Urticaceae; 6 Verbenaceae; 4 Acanthaceae; 2 Asclepiadaceae, Cannabaceae,<br>Connaraceae; 1 Anacardiaceae, Combretaceae, Lamiaceae, Poaceae, Polygonaceae, Rutaceae |
| Arctiinae     | Syntomini     | - | 5 Asteraceae; 4 Fabaceae; 3 Poaceae; 2 Anacardiaceae, Theaceae; 1 Brassicaceae,                                                                                                   |

---

|              |             |                |                                                                                                                                                                                                                                                                                                                                                                                                                                                                                                                                                                                                         |
|--------------|-------------|----------------|---------------------------------------------------------------------------------------------------------------------------------------------------------------------------------------------------------------------------------------------------------------------------------------------------------------------------------------------------------------------------------------------------------------------------------------------------------------------------------------------------------------------------------------------------------------------------------------------------------|
|              |             |                | Convolvulaceae, Cucurbitaceae, Fagaceae, Rutaceae, Santalaceae, Solanaceae, Theaceae, Verbenaceae, Vitaceae                                                                                                                                                                                                                                                                                                                                                                                                                                                                                             |
| Arctiinae    | Amerilini   | -              | 1 Apocynaceae, Asclepiadaceae, Dioscoreaceae, Rubiaceae, Smilacaceae                                                                                                                                                                                                                                                                                                                                                                                                                                                                                                                                    |
| Arctiinae    | Arctiini    | Callimorphinae | 13 Fabaceae; 12 Boraginaceae; 1 Alliaceae, Asteraceae, Musaceae, Poaceae, Sterculiaceae, Verbenaceae                                                                                                                                                                                                                                                                                                                                                                                                                                                                                                    |
| Arctiinae    | Arctiini    | Pericopinae    | 18 Asteraceae; 1 Brassicaceae, Fabaceae, Orchidaceae, Rubiaceae                                                                                                                                                                                                                                                                                                                                                                                                                                                                                                                                         |
| Arctiinae    | Arctiini    | Euchromiina    | 3 Convolvulaceae; 1 Dioscoreaceae, Malvaceae, Passifloraceae, Scrophulariaceae                                                                                                                                                                                                                                                                                                                                                                                                                                                                                                                          |
| Arctiinae    | Arctiini    | Spilosomina    | 30 Fabaceae; 21 Poaceae; 16 Asteraceae; 8 Verbenaceae; 6 Malvaceae, Rubiaceae, Solanaceae; 5 Convolvulaceae, Meliaceae; 4 Dioscoreaceae, Moraceae; 3 Lamiaceae, Orchidaceae, Pedaliaceae; 2 Arecaceae, Boraginaceae, Brassicaceae, Chenopodiaceae, Cucurbitaceae, Euphorbiaceae, Musaceae, Scrophulariaceae, Urticaceae; 1 Acanthaceae, Amaranthaceae, Anacardiaceae, Asparagaceae, Bombacaceae, Cannabaceae, Caprifoliaceae, Commelinaceae, Geraniaceae, Goodeniaceae, Linaceae, Lythraceae, Magnoliaceae, Plantaginaceae, Polygonaceae, Rosaceae, Salicaceae, Sterculiaceae, Tiliaceae, Zingiberaceae |
| Lymantriinae | Lymantriini | -              | 15 Fabaceae; 13 Dipterocarpaceae; 10 Combretaceae; 9 Anacardiaceae, Rosaceae; 8 Myrtaceae; 7 Euphorbiaceae, Lythraceae; 6 Fagaceae, Rubiaceae; 5 Pinaceae; 4 Casuarinaceae, Moraceae; 3                                                                                                                                                                                                                                                                                                                                                                                                                 |

|              |            |   |                                                                                                                                                                                                                                                                                                                                                                                                                                                                                                                                                                                                                                                                                                                                                                                                                                                                                                                                                                                 |
|--------------|------------|---|---------------------------------------------------------------------------------------------------------------------------------------------------------------------------------------------------------------------------------------------------------------------------------------------------------------------------------------------------------------------------------------------------------------------------------------------------------------------------------------------------------------------------------------------------------------------------------------------------------------------------------------------------------------------------------------------------------------------------------------------------------------------------------------------------------------------------------------------------------------------------------------------------------------------------------------------------------------------------------|
|              |            |   | Lecythidaceae; 2 Arecaceae, Hamamelidaceae, Meliaceae, Salicaceae, Sterculiaceae, Theaceae, Verbenaceae; 1 Apocynaceae, Begoniaceae, Betulaceae, Bombacaceae, Ebenaceae, Geraniaceae, Juglandaceae, Loranthaceae, Malvaceae, Rhamnaceae, Rutaceae, Sapotaceae, Turneraceae                                                                                                                                                                                                                                                                                                                                                                                                                                                                                                                                                                                                                                                                                                      |
| Lymantriinae | Orgyiini   | - | 87 Fabaceae; 28 Poaceae; 19 Myrtaceae, Rosaceae; 18 Dipterocarpaceae; 16 Euphorbiaceae; 13 Rubiaceae; 11 Anacardiaceae, Sapindaceae; 10 Verbenaceae; 9 Bombacaceae, Moraceae; 8 Lauraceae, Sterculiaceae; 7 Pinaceae, Theaceae; 6 Arecaceae, Combretaceae, Fagaceae, Lythraceae; 5 Lecythidaceae, Malvaceae, Sapotaceae; 4 Brassicaceae, Geraniaceae, Rutaceae, Salicaceae, Solanaceae, Tiliaceae; 3 Asteraceae, Cannaceae, Clusiaceae, Ericaceae, Melastomataceae, Rhamnaceae; 2 Annonaceae, Apocynaceae, Cannabaceae, Loranthaceae, Musaceae, Orchidaceae, Oxalidaceae, Polygonaceae, Vitaceae; 1 Acanthaceae, Asparagaceae, Begoniaceae, Berberidaceae, Betulaceae, Bixaceae, Boraginaceae, Convolvulaceae, Corylaceae, Cucurbitaceae, Cupressaceae, Cyperaceae, Dilleniaceae, Dioscoreaceae, Ebenaceae, Gleicheniaceae, Iridaceae, Lamiaceae, Leeaceae, Linaceae, Malpighiaceae, Marantaceae, Moringaceae, Nelumbonaceae, Proteaceae, Santalaceae, Tamaricaceae, Urticaceae |
| Lymantriinae | Daplasini  | - | No records                                                                                                                                                                                                                                                                                                                                                                                                                                                                                                                                                                                                                                                                                                                                                                                                                                                                                                                                                                      |
| Lymantriinae | Locharnini | - | 1 Leeaceae                                                                                                                                                                                                                                                                                                                                                                                                                                                                                                                                                                                                                                                                                                                                                                                                                                                                                                                                                                      |

|              |               |   |                                                                                                                                                                                                                                                                                                                                                                                                                                                                                                                                                                                                                                                                                                                                                                                                                                                                                                                                                        |
|--------------|---------------|---|--------------------------------------------------------------------------------------------------------------------------------------------------------------------------------------------------------------------------------------------------------------------------------------------------------------------------------------------------------------------------------------------------------------------------------------------------------------------------------------------------------------------------------------------------------------------------------------------------------------------------------------------------------------------------------------------------------------------------------------------------------------------------------------------------------------------------------------------------------------------------------------------------------------------------------------------------------|
| Lymantriinae | Arctornithini | - | 10 Dipterocarpaceae; 5 Lauraceae; 4 Anacardiaceae, Theaceae; 3 Bombacaceae, Combretaceae; 2 Sapindaceae, Sterculiaceae; 1 Brassicaceae, Ebenaceae, Euphorbiaceae, Lythraceae, Poaceae                                                                                                                                                                                                                                                                                                                                                                                                                                                                                                                                                                                                                                                                                                                                                                  |
| Lymantriinae | Leucomini     | - | 7 Lauraceae; 4 Moraceae; 2 Euphorbiaceae, Salicaceae, Ulmaceae; 1 Acanthaceae, Anacardiaceae, Bombacaceae, Magnoliaceae, Sapindaceae, Theaceae                                                                                                                                                                                                                                                                                                                                                                                                                                                                                                                                                                                                                                                                                                                                                                                                         |
| Lymantriinae | Nygmiini      | - | 78 Fabaceae; 36 Euphorbiaceae; 34 Poaceae; 22 Anacardiaceae; 15 Myrtaceae; 14 Combretaceae, Theaceae; 13 Rubiaceae; 11 Lauraceae; 10 Dipterocarpaceae, Lythraceae, Malvaceae, Rutaceae; 9 Rhamnaceae; 8 Loranthaceae; 7 Asteraceae, Moraceae; 6 Melastomataceae, Sapindaceae; 5 Fagaceae; 4 Apocynaceae, Arecaceae, Brassicaceae, Cucurbitaceae, Sterculiaceae, Tamaricaceae, Verbenaceae; 3 Lecythidaceae, Nelumbonaceae, Orchidaceae, Salicaceae, Solanaceae; 2 Annonaceae, Asclepiadaceae, Convolvulaceae, Coriariaceae, Juglandaceae, Leeaceae, Rhizophoraceae, Sapotaceae, Tiliaceae, Zingiberaceae; 1 Acanthaceae, Acoraceae, Amaranthaceae, Amaryllidaceae, Berberidaceae, Bombacaceae, Capparaceae, Casuarinaceae, Cycadaceae, Geraniaceae, Hamamelidaceae, Hippocastanaceae, Iridaceae, Linaceae, Magnoliaceae, Musaceae, Meliaceae, Myrsinaceae, Oleaceae, Oxalidaceae, Passifloraceae, Pedaliaceae, Plantaginaceae, Tropaeolaceae, Vitaceae |

Notes: The host plant data of this table are collected mainly from Robinson et al. (2001), with a few from Common (1990) and Holloway (2005, 2011). Families with asterisks may now be absorbed into Malvaceae in APG system (Angiosperm Phylogeny Group system).
