# Supplementary material for: Polyphagy and diversification in tussock moths: Support for the oscillation hypothesis from extreme generalists
Source: PubMed Central journal article supplement (PMC5632610; doi:10.1002/ece3.3350), 2017-08-30
Supplement: ECE3-7-7975-s005.pdf [file ECE3-7-7975-s005.pdf]

Table S7. Species numbers of Lymantriinae genus-level taxa, restricted to well-studied regional faunas, and the number of host plant orders used globally in these clades. Analyses were performed with and without some problematic taxa (in bold).

| Genus names                            | Order numbers<br>(Host plants) | Species<br>numbers |
|----------------------------------------|--------------------------------|--------------------|
| <i>Arctornis</i>                       | 12                             | 88                 |
| <i>Leucoma</i>                         | 7                              | 6                  |
| <i>Lymantria</i>                       | 31                             | 34                 |
| <i>Albarracina</i>                     | 1                              | 1                  |
| <i>Sphrageidus</i>                     | 18                             | 2                  |
| <i>Laelia</i>                          | 4                              | 5                  |
| <i>Calliteara</i>                      | 23                             | 17                 |
| <b><i>Euproctis "chrysorrhoea"</i></b> | <b>13</b>                      | <b>1</b>           |
| <i>Orgyia</i>                          | 35                             | 23                 |
| <i>Telochurus</i>                      | 5                              | 2                  |
| <i>Dasychira</i>                       | 10                             | 16                 |
| <b><i>Olene "mendosa"</i></b>          | <b>24</b>                      | <b>2</b>           |
| <b><i>Olene "dudgeoni"</i></b>         | <b>2</b>                       | <b>1</b>           |
| <i>Ilema</i>                           | 14                             | 10                 |
| <i>Arna</i>                            | 16                             | 8                  |
| <i>Somena</i>                          | 5                              | 4                  |
| <i>Orvasca</i>                         | 14                             | 14                 |
| <i>Artaxa</i>                          | 9                              | 16                 |
| <i>Micromorphe</i>                     | 2                              | 4                  |
| <i>Toxoproctis</i>                     | 5                              | 18                 |
| <b><i>Nygmia "javana"</i></b>          | <b>13</b>                      | <b>36</b>          |
| <i>Bembina</i>                         | 2                              | 3                  |
| <i>Cispia</i>                          | 1                              | 1                  |
| <i>Locharna</i>                        | 1                              | 1                  |
| <i>Kidokuga</i>                        | 7                              | 2                  |

|                      |         |   |
|----------------------|---------|---|
| <i>Perina</i>        | 3       | 2 |
| <i>Kuromondokuga</i> | 4       | 3 |
| <i>Ivela</i>         | 3       | 2 |
| <i>Cifuna</i>        | 9       | 1 |
| <i>Pantana</i>       | 1       | 3 |
| <i>Lacida</i>        | Missing | 1 |
| <i>Imaus</i>         | Missing | 1 |
| <i>Dura</i>          | Missing | 2 |
| <i>Daplasa</i>       | Missing | 2 |

---
